# Supplementary material for: Nickel/Brønsted acid dual-catalyzed regioselective C–H bond allylation of phenols with 1,3-dienes
Source: Royal Society of Chemistry journal article supplement (doi:10.1039/d2qo00637e), 2022-01-01
Supplement: d2qo00637e1.pdf [file d2qo00637e1.pdf]

Supplementary Information

**Nickel/Bronsted acid dual-catalyzed regioselective C-H bond  
allylation of phenols with 1,3-dienes**

*Jiao Long, Chao Ding and Guoyin Yin\**

The Institute for Advanced Studies, Wuhan University, Wuhan, Hubei 430072, P. R.  
of China

\*corresponding author,  
E-mail: yinguoyin@whu.edu.cn

## Table of Contents

|                                                                                                  |    |
|--------------------------------------------------------------------------------------------------|----|
| 1. General information .....                                                                     | 1  |
| 2. General procedure for nickel/brønsted acid dual-catalyzed regioselective C-H bond allylation. | 1  |
| 3. Deuterium-labeled experiments .....                                                           | 7  |
| 4. References .....                                                                              | 11 |
| 5. NMR spectra .....                                                                             | 12 |

## 1. General information

Unless otherwise noted, all reagents and solvents were purchased from commercial suppliers (Energy Chemical, Adamas-beta®, J&K, laajoo and so on) and used without further purification. All reactions were assembled on a Schlenk vacuum line or in a glovebox using oven-dried glass tube and were stirred with Teflon-coated magnetic stirring bars unless otherwise specified. Reactions were monitored using thin-layer chromatography (TLC), visualization of the developed plates was performed under UV light (254 nm) or KMnO<sub>4</sub> stain. Purification and isolation of products were performed *via* silica gel (200-300 mesh) chromatography. <sup>1</sup>H, <sup>2</sup>H, <sup>13</sup>C and <sup>19</sup>F NMR spectra were recorded on Bruker 400 MHz or 600 MHz spectrometer. <sup>1</sup>H NMR spectra were internally referenced to TMS. <sup>13</sup>C NMR spectra were internally referenced to the residual solvent signal. Data are reported as follows: chemical shift (δ ppm), multiplicity (s = singlet, d = doublet, t = triplet, q = quartet, dd = doublet of doublet, dt = doublet of triplet, ddd = doublet of doublet of doublet, m = multiplet), coupling constants (Hz) and integration. GC analysis were performed on a Shimadzu GC-2010 Pro gas chromatograph with an FID detector. All new products were further characterized by high resolution mass spectra (HRMS). HRMS were measured with a Thermo Orbitrap Elite instrument (ESI or APCI).

## 2. General procedure for nickel/brønsted acid dual-catalyzed regioselective C-H bond allylation

Scheme S1:

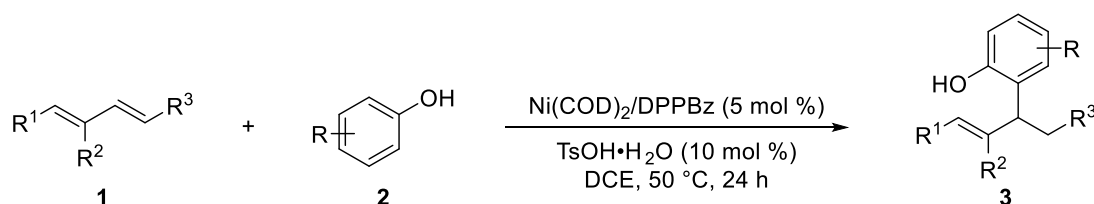

A reaction tube was charged with Ni(COD)<sub>2</sub> (2.8 mg, 0.01 mmol, 0.05 equiv *vs* phenols **2**), DPPBz (4.5 mg, 0.01 mmol, 0.05 equiv *vs* phenols **2**), TsOH·H<sub>2</sub>O (3.8 mg, 0.02 mmol, 0.10 equiv *vs* phenols **2**), phenols **2** (0.2 mmol, 1.0 equiv) and 1.0 mL DCE in an argon-filled glovebox, then 1,3-dienes **1** (0.24 mmol, 1.2 equiv *vs* phenols **2**) was added. The reaction vessel was sealed using a PTFE septum and removed from the glovebox, and the mixture was stirred at 50 °C for 24 h. After complete conversion, the resulting mixture was cooled to rt, then the residue was purified by SiO<sub>2</sub> column chromatography to give the desired product **3**.

(*E*)-1-(4-phenylbut-3-en-2-yl)naphthalen-2-ol (**3aa**)<sup>1</sup>: yellow oil 52.7 mg, 96% isolated yield; <sup>1</sup>H NMR (400 MHz, CDCl<sub>3</sub>) δ 8.04 (d, *J* = 8.6 Hz, 1H), 7.80 (dd, *J* = 8.1, 1.4 Hz, 1H), 7.68 (d, *J* = 8.8 Hz, 1H), 7.49 (ddd, *J* = 8.6, 6.8, 1.4 Hz, 1H), 7.41-7.38 (m, 2H), 7.36-7.29 (m, 3H), 7.26-7.22 (m, 1H), 7.07 (d, *J* = 8.8 Hz, 1H), 6.80-6.71 (m, 2H), 5.88 (s, 1H), 4.67-4.61 (m, 1H), 1.63 (d, *J* = 7.1 Hz, 3H)

ppm;  $^{13}\text{C}$  NMR (100 MHz,  $\text{CDCl}_3$ )  $\delta$  152.3, 136.6, 133.5, 132.5, 130.5, 129.6, 128.9, 128.8, 128.7, 127.7, 126.5, 126.4, 123.1, 122.4, 121.2, 119.2, 33.5, 17.2 ppm.

**(E)-1-(4-(2-methoxyphenyl)but-3-en-2-yl)naphthalen-2-ol (3ba)**: yellow oil 51.0 mg, 84% isolated yield;  $^1\text{H}$  NMR (400 MHz,  $\text{CDCl}_3$ )  $\delta$  8.04 (d,  $J$  = 8.6 Hz, 1H), 7.78 (dd,  $J$  = 8.2, 1.4 Hz, 1H), 7.66 (d,  $J$  = 8.8 Hz, 1H), 7.48 (ddd,  $J$  = 8.5, 6.8, 1.5 Hz, 1H), 7.42 (dd,  $J$  = 7.7, 1.8 Hz, 1H), 7.33 (ddd,  $J$  = 8.0, 6.7, 1.0 Hz, 1H), 7.22 (ddd,  $J$  = 8.8, 6.5, 1.7 Hz, 1H), 7.13 (dd,  $J$  = 16.6, 2.5 Hz, 1H), 7.07 (d,  $J$  = 8.8 Hz, 1H), 6.90 (td,  $J$  = 7.5, 1.1 Hz, 1H), 6.86 (dd,  $J$  = 8.2, 1.1 Hz, 1H), 6.75 (dd,  $J$  = 16.6, 4.0 Hz, 1H), 6.16 (s, 1H), 4.66-4.59 (m, 1H), 3.83 (s, 3H), 1.63 (d,  $J$  = 7.1 Hz, 3H) ppm;  $^{13}\text{C}$  NMR (100 MHz,  $\text{CDCl}_3$ )  $\delta$  156.6, 152.5, 134.3, 132.5, 129.6, 128.9, 128.8, 128.7, 126.9, 126.5, 125.7, 123.0, 122.3, 121.3, 120.7, 119.4, 110.8, 55.4, 33.8, 17.0 ppm. **HRMS (APCI)** calculated  $[\text{M}+\text{H}]^+$  for  $\text{C}_{21}\text{H}_{21}\text{O}_2$  = 305.1536, found: 305.1530.

**(E)-1-(4-(3-methoxyphenyl)but-3-en-2-yl)naphthalen-2-ol (3ca)**: yellow oil 53.3 mg, 88% isolated yield;  $^1\text{H}$  NMR (400 MHz,  $\text{CDCl}_3$ )  $\delta$  8.04 (d,  $J$  = 8.6 Hz, 1H), 7.80 (dt,  $J$  = 8.1, 0.7 Hz, 1H), 7.68 (d,  $J$  = 8.8 Hz, 1H), 7.49 (ddd,  $J$  = 8.5, 6.8, 1.5 Hz, 1H), 7.35 (ddd,  $J$  = 8.0, 6.9, 1.1 Hz, 1H), 7.23 (t,  $J$  = 7.9 Hz, 1H), 7.07 (d,  $J$  = 8.8 Hz, 1H), 7.00 (d,  $J$  = 7.7 Hz, 1H), 6.93 (t,  $J$  = 2.0 Hz, 1H), 6.81-6.74 (m, 2H), 6.70 (dd,  $J$  = 16.4, 1.6 Hz, 1H), 5.83 (s, 1H), 4.67-4.61 (m, 1H), 3.80 (s, 3H), 1.63 (d,  $J$  = 7.1 Hz, 3H) ppm;  $^{13}\text{C}$  NMR (100 MHz,  $\text{CDCl}_3$ )  $\delta$  159.9, 152.2, 138.1, 133.9, 132.5, 130.3, 129.6, 128.9, 128.8, 126.5, 123.1, 122.4, 121.2, 119.2, 119.0, 113.5, 111.5, 55.2, 33.5, 17.2 ppm. **HRMS (APCI)** calculated  $[\text{M}+\text{H}]^+$  for  $\text{C}_{21}\text{H}_{21}\text{O}_2$  = 305.1536, found: 305.1531.

**(E)-1-(4-(4-methoxyphenyl)but-3-en-2-yl)naphthalen-2-ol (3da)**: yellow oil 25.4 mg, 42% isolated yield;  $^1\text{H}$  NMR (400 MHz,  $\text{CDCl}_3$ )  $\delta$  8.04 (dt,  $J$  = 8.6, 0.9 Hz, 1H), 7.79 (dd,  $J$  = 8.1, 1.4 Hz, 1H), 7.68 (d,  $J$  = 8.8 Hz, 1H), 7.49 (ddd,  $J$  = 8.5, 6.8, 1.5 Hz, 1H), 7.36-7.32 (m, 3H), 7.07 (d,  $J$  = 8.8 Hz, 1H), 6.87-6.83 (m, 2H), 6.71 (dd,  $J$  = 16.5, 2.2 Hz, 1H), 6.61 (dd,  $J$  = 16.4, 3.7 Hz, 1H), 6.02 (s, 1H), 4.65-4.58 (m, 1H), 3.80 (s, 3H), 1.61 (d,  $J$  = 7.1 Hz, 3H) ppm;  $^{13}\text{C}$  NMR (100 MHz,  $\text{CDCl}_3$ )  $\delta$  159.4, 152.4, 132.5, 131.0, 130.1, 129.6, 129.3, 128.9, 128.7, 127.6, 126.5, 123.0, 122.3, 121.3, 119.3, 114.1, 55.3, 33.3, 17.2 ppm. **HRMS (ESI)** calculated  $[\text{M}-\text{H}]^-$  for  $\text{C}_{21}\text{H}_{19}\text{O}_2$  = 303.1391, found: 303.1392.

**(E)-1-(4-(4-fluorophenyl)but-3-en-2-yl)naphthalen-2-ol (3ea)**: yellow oil 58.5 mg, > 99% isolated yield;  $^1\text{H}$  NMR (400 MHz,  $\text{CDCl}_3$ )  $\delta$  8.04 (dt,  $J$  = 8.6, 0.9 Hz, 1H), 7.80 (dd,  $J$  = 8.1, 1.5 Hz, 1H), 7.69 (d,  $J$  = 8.8 Hz, 1H), 7.49 (ddd,  $J$  = 8.5, 6.8, 1.4 Hz, 1H), 7.38-7.33 (m, 3H), 7.07 (d,  $J$  = 8.8 Hz, 1H), 7.03-6.97 (m, 2H), 6.73-6.64 (m, 2H), 5.77 (s, 1H), 4.66-4.61 (m, 1H), 1.63 (d,  $J$  = 7.1 Hz, 3H) ppm;  $^{13}\text{C}$  NMR (100 MHz,  $\text{CDCl}_3$ )  $\delta$  162.4 (d,  $J$  = 247.0 Hz), 152.1, 133.4, 132.8 (d,  $J$  = 3.0

Hz), 132.5, 129.6, 129.2, 128.9, 128.8, 127.8 (d,  $J = 8.1$  Hz), 126.6, 123.1, 122.4, 121.2, 119.2, 115.5 (d,  $J = 21.6$  Hz), 33.5, 17.3 ppm;  $^{19}\text{F}$  NMR (376 MHz,  $\text{CDCl}_3$ )  $\delta$  -114.19 ppm. HRMS (ESI) calculated  $[\text{M}-\text{H}]^-$  for  $\text{C}_{20}\text{H}_{16}\text{FO} = 291.1191$ , found: 291.1196.

**(E)-1-(3-methyl-4-phenylbut-3-en-2-yl)naphthalen-2-ol (3fa)**: yellow oil 49.1 mg, 85% isolated

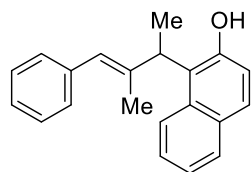

yield;  $^1\text{H}$  NMR (400 MHz,  $\text{CDCl}_3$ )  $\delta$  8.07 (dt,  $J = 8.7, 0.9$  Hz, 1H), 7.80 (dd,  $J = 8.2, 1.4$  Hz, 1H), 7.68 (d,  $J = 8.8$  Hz, 1H), 7.51 (ddd,  $J = 8.5, 6.8, 1.5$  Hz, 1H), 7.40-7.32 (m, 5H), 7.28-7.24 (m, 1H), 7.07 (d,  $J = 8.8$  Hz, 1H), 6.89 (s, 1H), 6.53 (s, 1H), 4.45 (q,  $J = 6.7$  Hz, 1H), 1.84 (s, 3H), 1.63 (d,  $J = 7.1$  Hz, 3H) ppm;  $^{13}\text{C}$  NMR (100 MHz,  $\text{CDCl}_3$ )  $\delta$  153.0, 143.5, 137.2, 133.1, 129.5, 128.9, 128.7, 128.3, 126.8, 126.6, 125.7, 123.0, 122.0, 120.3, 119.2, 39.7, 18.6, 16.8 ppm. HRMS (ESI) calculated  $[\text{M}-\text{H}]^-$  for  $\text{C}_{21}\text{H}_{19}\text{O} = 287.1441$ , found: 287.1433.

**(E)-1-(4-cyclohexylbut-3-en-2-yl)naphthalen-2-ol (3ga)**: yellow oil 42.1 mg, 75% isolated yield;  $^1\text{H}$

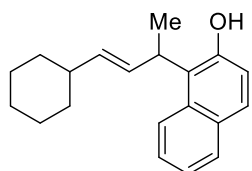

NMR (400 MHz,  $\text{CDCl}_3$ )  $\delta$  7.96 (dt,  $J = 8.7, 0.9$  Hz, 1H), 7.76 (dt,  $J = 8.1, 0.8$  Hz, 1H), 7.64 (d,  $J = 8.5$  Hz, 1H), 7.45 (ddd,  $J = 8.5, 6.8, 1.4$  Hz, 1H), 7.31 (ddd,  $J = 8.1, 6.8, 1.1$  Hz, 1H), 7.05 (d,  $J = 8.8$  Hz, 1H), 6.36 (s, 1H), 5.97 (ddd,  $J = 16.1, 3.4, 1.0$  Hz, 1H), 5.86 (ddd,  $J = 16.1, 6.7, 2.2$  Hz, 1H), 4.43-4.36 (m, 1H), 2.12-2.04 (m, 1H), 1.79-1.71 (m, 4H), 1.69-1.62 (m, 1H), 1.46 (d,  $J = 7.2$  Hz, 3H), 1.34-1.23 (m, 2H), 1.21-1.07 (m, 3H) ppm;  $^{13}\text{C}$  NMR (100 MHz,  $\text{CDCl}_3$ )  $\delta$  152.8, 138.3, 132.4, 131.2, 129.4, 128.8, 128.6, 126.4, 122.9, 122.1, 121.0, 119.4, 40.8, 33.0, 32.93, 32.88, 26.0, 25.94, 25.91, 16.7 ppm. HRMS (ESI) calculated  $[\text{M}-\text{H}]^-$  for  $\text{C}_{20}\text{H}_{23}\text{O} = 279.1754$ , found: 279.1748.

**1-(cyclohex-2-en-1-yl)naphthalen-2-ol (3ha)**<sup>2</sup>: colorless oil 37.8 mg, 84% isolated yield;  $^1\text{H}$  NMR

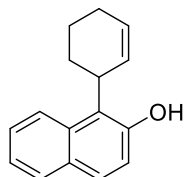

(400 MHz,  $\text{CDCl}_3$ )  $\delta$  7.94 (d,  $J = 8.7$  Hz, 1H), 7.77 (dd,  $J = 8.1, 1.4$  Hz, 1H), 7.66 (d,  $J = 8.8$  Hz, 1H), 7.47 (ddd,  $J = 8.5, 6.7, 1.4$  Hz, 1H), 7.32 (ddd,  $J = 8.0, 6.8, 1.1$  Hz, 1H), 7.09 (d,  $J = 8.9$  Hz, 1H), 6.59 (s, 1H), 6.28 (d,  $J = 8.6$  Hz, 1H), 6.08 (d,  $J = 9.9$  Hz, 1H), 4.33-4.28 (m, 1H), 2.29-2.21 (m, 2H), 2.15-2.09 (m, 1H), 1.98-1.92 (m, 1H), 1.86-1.77 (m, 2H) ppm;  $^{13}\text{C}$  NMR (100 MHz,  $\text{CDCl}_3$ )  $\delta$  153.1, 133.4, 132.6, 130.3, 129.3, 128.8, 128.5, 126.4, 122.9, 121.9, 120.6, 119.4, 34.4, 28.7, 25.1, 22.0 ppm.

**(E)-1-(1-phenylpent-1-en-3-yl)naphthalen-2-ol (3ia)**: yellow oil 25.1 mg, 44% isolated yield;  $^1\text{H}$

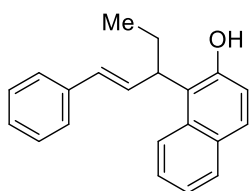

NMR (400 MHz,  $\text{CDCl}_3$ )  $\delta$  8.08 (dt,  $J = 8.7, 0.9$  Hz, 1H), 7.79 (dd,  $J = 8.1, 1.5$  Hz, 1H), 7.68 (d,  $J = 8.7$  Hz, 1H), 7.47 (ddd,  $J = 8.6, 6.8, 1.5$  Hz, 1H), 7.37-7.26 (m, 5H), 7.23-7.18 (m, 1H), 7.07 (d,  $J = 8.7$  Hz, 1H), 6.74 (dd,  $J = 16.3, 4.7$  Hz, 1H), 6.60 (dd,  $J = 16.3, 2.1$  Hz, 1H), 5.52 (s, 1H), 4.47-4.41 (m, 1H), 2.24-2.14 (m, 1H), 2.12-2.01 (m, 1H), 0.91 (t,  $J = 7.4$  Hz, 3H) ppm;  $^{13}\text{C}$  NMR (100 MHz,  $\text{CDCl}_3$ )  $\delta$  152.0, 137.0, 133.5, 132.3, 130.5, 129.7, 128.9, 128.7, 128.6, 127.5, 126.33, 126.25, 123.0, 120.5, 119.1, 40.9, 25.7, 12.6 ppm. HRMS (ESI) calculated  $[\text{M}-\text{H}]^-$  for  $\text{C}_{21}\text{H}_{19}\text{O} = 287.1441$ , found: 287.1439.

**(E)-1-(1-(4-fluorophenyl)pent-1-en-3-yl)naphthalen-2-ol (3ja)**: yellow oil 27.7 mg, 45% isolated

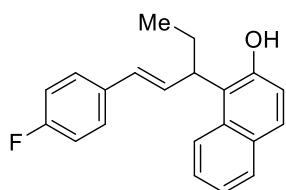

yield;  $^1\text{H}$  NMR (400 MHz,  $\text{CDCl}_3$ )  $\delta$  8.08 (d,  $J$  = 8.7 Hz, 1H), 7.79 (dd,  $J$  = 8.1, 1.4 Hz, 1H), 7.68 (d,  $J$  = 8.7 Hz, 1H), 7.47 (ddd,  $J$  = 8.5, 6.8, 1.5 Hz, 1H), 7.36-7.29 (m, 3H), 7.06 (d,  $J$  = 8.8 Hz, 1H), 6.99-6.94 (m, 2H), 6.66 (dd,  $J$  = 16.3, 4.8 Hz, 1H), 6.54 (dd,  $J$  = 16.3, 2.0 Hz, 1H), 5.45 (s, 1H), 4.45-4.40 (m, 1H), 2.23-2.12 (m, 1H), 2.12-2.01 (m, 1H), 0.91 (t,  $J$  = 7.4 Hz, 3H) ppm;  $^{13}\text{C}$  NMR (100 MHz,  $\text{CDCl}_3$ )  $\delta$  162.2 (d,  $J$  = 246.6 Hz), 151.8, 133.4, 133.2 (d,  $J$  = 3.0 Hz), 132.2, 129.7, 129.2, 128.9, 128.7, 127.7 (d,  $J$  = 8.0 Hz), 126.4, 123.1, 120.5, 119.0, 115.4 (d,  $J$  = 21.5 Hz), 41.0, 25.8, 12.6 ppm;  $^{19}\text{F}$  NMR (376 MHz,  $\text{CDCl}_3$ )  $\delta$  -114.66 ppm. HRMS (APCI) calculated  $[\text{M}+\text{H}]^+$  for  $\text{C}_{21}\text{H}_{20}\text{FO}$  = 307.1493, found: 307.1494.

**9-(tert-butyl)-12-methyl-7a,8,10,11,11a,12-hexahydro-9H-benzo[a]xanthene (3ka)**: colorless oil

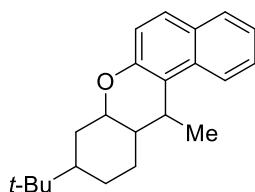

49.8 mg, 81% isolated yield;  $^1\text{H}$  NMR (400 MHz,  $\text{CDCl}_3$ )  $\delta$  7.78 (dt,  $J$  = 8.3, 0.8 Hz, 1H), 7.68 (dq,  $J$  = 8.4, 0.9 Hz, 1H), 7.64 (d,  $J$  = 8.7 Hz, 1H), 7.42 (ddd,  $J$  = 8.3, 6.8, 1.3 Hz, 1H), 7.25 (ddd,  $J$  = 8.1, 6.8, 1.2 Hz, 1H), 7.10 (d,  $J$  = 8.7 Hz, 1H), 3.31 (q,  $J$  = 7.1 Hz, 1H), 2.22-2.12 (m, 1H), 2.05 (dq,  $J$  = 13.7, 3.2 Hz, 1H), 1.85-1.76 (m, 1H), 1.62-1.47 (m, 4H), 1.32-1.24 (m, 4H), 1.13-1.05 (m, 1H), 0.91 (s, 9H) ppm;  $^{13}\text{C}$  NMR (100 MHz,  $\text{CDCl}_3$ )  $\delta$  155.2, 131.0, 129.3, 129.0, 128.8, 126.3, 124.4, 122.23, 122.20, 112.9, 89.6, 47.7, 44.9, 37.5, 32.5, 31.9, 27.6, 23.5, 23.2, 15.2 ppm. HRMS (APCI) calculated  $[\text{M}+\text{H}]^+$  for  $\text{C}_{22}\text{H}_{29}\text{O}$  = 309.2213, found: 309.2211.

**(E)-4,5-dimethyl-2-(4-phenylbut-3-en-2-yl)phenol (3ab)**: yellow oil 42.7 mg, 85% isolated yield;  $^1\text{H}$

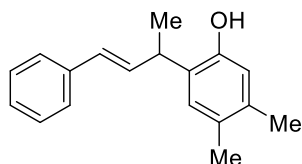

NMR (400 MHz,  $\text{CDCl}_3$ )  $\delta$  7.36-7.33 (m, 2H), 7.29-7.25 (m, 2H), 7.21-7.17 (m, 1H), 6.93 (s, 1H), 6.59 (s, 1H), 6.49 (d,  $J$  = 16.2 Hz, 1H), 6.41 (dd,  $J$  = 16.0, 5.7 Hz, 1H), 4.89 (s, 1H), 3.86-3.79 (m, 1H), 2.18 (s, 6H), 1.46 (d,  $J$  = 7.1 Hz, 3H) ppm;  $^{13}\text{C}$  NMR (100 MHz,  $\text{CDCl}_3$ )  $\delta$  151.3, 137.2, 135.7, 134.3, 129.0, 128.7, 128.5, 127.8, 127.2, 126.2, 117.4, 36.4, 19.6, 19.3, 18.9 ppm. HRMS (APCI) calculated  $[\text{M}+\text{H}]^+$  for  $\text{C}_{18}\text{H}_{21}\text{O}$  = 253.1587, found: 253.1581.

**(E)-6-(4-phenylbut-3-en-2-yl)benzo[d][1,3]dioxol-5-ol (3ac)**<sup>1</sup>: yellow oil 50.6 mg, 94% isolated yield;

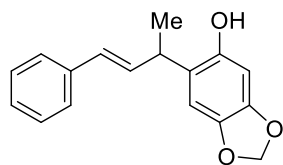

$^1\text{H}$  NMR (400 MHz,  $\text{CDCl}_3$ )  $\delta$  7.3-7.33 (m, 2H), 7.30-7.25 (m, 2H), 7.22-7.17 (m, 1H), 6.68 (s, 1H), 6.46 (d,  $J$  = 16.0 Hz, 1H), 6.40 (s, 1H), 6.34 (dd,  $J$  = 16.0, 6.2 Hz, 1H), 5.86 (s, 2H), 4.97 (s, 1H), 3.83-3.76 (m, 1H), 1.42 (d,  $J$  = 7.0 Hz, 3H) ppm;  $^{13}\text{C}$  NMR (100 MHz,  $\text{CDCl}_3$ )  $\delta$  147.9, 146.3, 141.7, 137.0, 133.9, 129.2, 128.5, 127.3, 126.2, 122.8, 107.2, 101.0, 98.8, 36.3, 19.6 ppm.

**2,5-bis((E)-4-phenylbut-3-en-2-yl)benzene-1,4-diol (3ad)**: yellow oil 52.7 mg, 71% isolated yield;  $^1\text{H}$

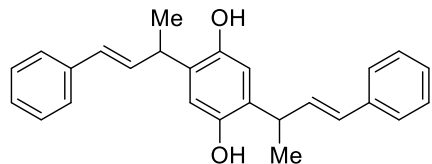

NMR (600 MHz,  $\text{CDCl}_3$ )  $\delta$  7.36 (d,  $J$  = 7.3 Hz, 4H), 7.29 (t,  $J$  = 7.5 Hz, 4H), 7.22-7.19 (m, 2H), 6.67 (s, 2H), 6.50 (d,  $J$  = 16.1 Hz, 2H), 6.39 (dd,  $J$  = 16.0, 6.5 Hz, 2H), 4.68 (s,

2H), 3.85-3.80 (m, 2H), 1.45 (d,  $J = 7.0$  Hz, 6H) ppm;  $^{13}\text{C}$  NMR (150 MHz,  $\text{CDCl}_3$ )  $\delta$  147.4, 137.0, 133.7, 129.84, 129.83, 129.3, 128.5, 127.3, 126.2, 115.4, 36.40, 36.39, 19.44, 19.43 ppm. **HRMS** (APCI) calculated  $[\text{M}+\text{H}]^+$  for  $\text{C}_{26}\text{H}_{27}\text{O}_2 = 371.2006$ , found: 371.2004.

**(*E*)-4-methoxy-2-(4-phenylbut-3-en-2-yl)phenol (3ae)**<sup>1</sup>: yellow oil 17.0 mg, 33% isolated yield;  $^1\text{H}$  NMR (600 MHz,  $\text{CDCl}_3$ )  $\delta$  7.35 (d,  $J = 7.3$  Hz, 2H), 7.28 (t,  $J = 7.6$  Hz, 2H), 7.20 (t,  $J = 7.4$  Hz, 1H), 6.78 (d,  $J = 3.0$  Hz, 1H), 6.74 (d,  $J = 8.7$  Hz, 1H), 6.66 (dd,  $J = 8.7, 3.0$  Hz, 1H), 6.49 (d,  $J = 16.1$  Hz, 1H), 6.40 (dd,  $J = 16.0, 6.3$  Hz, 1H), 4.86 (s, 1H), 3.89-3.85 (m, 1H), 3.76 (s, 3H), 1.47 (d,  $J = 7.0$  Hz, 3H) ppm;  $^{13}\text{C}$  NMR (150 MHz,  $\text{CDCl}_3$ )  $\delta$  153.8, 147.4, 137.0, 133.7, 132.1, 129.3, 128.5, 127.3, 126.2, 116.6, 113.9, 111.8, 55.7, 36.8, 19.4 ppm.

**4-methoxy-2,6-bis((*E*)-4-phenylbut-3-en-2-yl)phenol (3ae')**: yellow oil 23.1 mg, 30% isolated yield;  $^1\text{H}$  NMR (600 MHz,  $\text{CDCl}_3$ )  $\delta$  7.35 (d,  $J = 7.5$  Hz, 4H), 7.29 (t,  $J = 7.5$  Hz, 4H), 7.21 (t,  $J = 7.4$  Hz, 2H), 6.68 (d,  $J = 1.8$  Hz, 2H), 6.50 (d,  $J = 16.1$  Hz, 2H), 6.40 (ddd,  $J = 16.0, 7.8, 6.4$  Hz, 2H), 4.95 (d,  $J = 5.8$  Hz, 1H), 3.92-3.88 (m, 2H), 3.78 (d,  $J = 2.4$  Hz, 3H), 1.47 (d,  $J = 7.0$  Hz, 6H) ppm;  $^{13}\text{C}$  NMR (150 MHz,  $\text{CDCl}_3$ )  $\delta$  153.66, 153.65, 145.41, 145.36, 137.0, 133.9, 133.8, 132.6, 132.5, 129.38, 129.36, 128.5, 127.3, 126.2, 111.2, 111.1, 55.7, 36.99, 36.97, 19.53, 19.51 ppm. **HRMS** (ESI) calculated  $[\text{M}-\text{H}]^-$  for  $\text{C}_{27}\text{H}_{27}\text{O}_2 = 383.2017$ , found: 383.2017.

**(*E*)-4-(4-phenylbut-3-en-2-yl)phenol (3af)**<sup>3</sup>: yellow oil 26.5 mg, 59% isolated yield;  $^1\text{H}$  NMR (400 MHz,  $\text{CDCl}_3$ )  $\delta$  7.36-7.33 (m, 2H), 7.30-7.26 (m, 2H), 7.21-7.17 (m, 1H), 7.15-7.11 (m, 2H), 6.80-6.76 (m, 2H), 6.41-6.31 (m, 2H), 4.81 (s, 1H), 3.61-3.55 (m, 1H), 1.43 (d,  $J = 7.0$  Hz, 3H) ppm;  $^{13}\text{C}$  NMR (100 MHz,  $\text{CDCl}_3$ )  $\delta$  153.8, 137.8, 137.6, 135.5, 128.5, 128.4, 128.2, 127.0, 126.1, 115.2, 41.7, 21.3 ppm.

**(*E*)-4-chloro-1-(4-phenylbut-3-en-2-yl)pyridin-2(1H)-one (3ag)**: yellow oil 28.1 mg, 54% isolated yield;  $^1\text{H}$  NMR (400 MHz,  $\text{CDCl}_3$ )  $\delta$  7.42-7.39 (m, 2H), 7.37-7.32 (m, 3H), 7.31-7.28 (m, 1H), 7.27-7.24 (m, 1H), 6.65 (dd,  $J = 16.2, 1.8$  Hz, 1H), 6.57 (dd,  $J = 9.7, 0.6$  Hz, 1H), 6.26 (dd,  $J = 16.1, 5.2$  Hz, 1H), 5.92-5.85 (m, 1H), 1.55 (d,  $J = 6.9$  Hz, 3H) ppm;  $^{13}\text{C}$  NMR (100 MHz,  $\text{CDCl}_3$ )  $\delta$  160.5, 139.9, 135.7, 133.1, 131.7, 128.7, 128.3, 127.9, 126.6, 121.7, 112.6, 51.8, 18.9 ppm. **HRMS** (ESI) calculated  $[\text{M}+\text{H}]^+$  for  $\text{C}_{15}\text{H}_{15}\text{ClNO} = 260.0837$ , found: 260.0833.

**(8*R*,9*S*,13*S*,14*S*)-3-hydroxy-13-methyl-2-((*E*)-4-phenylbut-3-en-2-yl)-6,7,8,9,11,12,13,14,15,16-decahydro-17*H*-cyclopenta[*a*]phenanthren-17-one (3ah)**: white solid 65.7 mg (a mixture of diastereomers), 82% isolated yield;  $^1\text{H}$  NMR (600 MHz,  $\text{CDCl}_3$ , reported as a mixture of

diastereomers)  $\delta$  7.37-7.35 (m, 2H), 7.31-7.28 (m, 2H), 7.23-7.20 (m, 1H), 7.11 (s, 1H), 6.57 (s, 1H), 6.52 (ddd,  $J$  = 16.0, 6.9, 1.4 Hz, 1H), 6.43 (dd,  $J$  = 16.0, 6.2 Hz, 1H), 4.98 (s, 1H), 3.87-3.81 (m, 1H), 2.90-2.80 (m, 2H), 2.51 (dd,  $J$  = 19.2, 8.4 Hz, 1H), 2.43-2.39 (m, 1H), 2.28-2.24 (m, 1H), 2.15 (dt,  $J$  = 19.1, 9.0 Hz, 1H), 2.07-2.03 (m, 1H), 2.01-1.97 (m, 1H), 1.97-1.94 (m, 1H), 1.66-1.59 (m, 2H), 1.54-1.40 (m, 7H), 0.91 (s, 3H) ppm;  $^{13}\text{C}$  NMR (150 MHz,  $\text{CDCl}_3$ , reported as a mixture of diastereomers)  $\delta$  151.6, 151.5, 137.2, 135.8, 135.7, 134.22, 134.20, 131.91, 131.89, 129.0, 128.9, 128.5, 128.40, 128.37, 127.2, 126.2, 124.8, 116.03, 115.99, 50.29, 50.27, 48.0, 44.04, 44.01, 38.31, 38.30, 36.9, 36.7, 35.9, 31.5, 29.0, 26.48, 26.46, 25.94, 25.92, 21.5, 19.63, 19.61, 13.8 ppm. **HRMS (APCI)** calculated  $[\text{M}+\text{H}]^+$  for  $\text{C}_{28}\text{H}_{33}\text{O}_2$  = 401.2475, found: 401.2467.

**(8*R*,9*S*,13*S*,14*S*,17*R*)-17-ethynyl-13-methyl-2-((*E*)-4-phenylbut-3-en-2-yl)-**

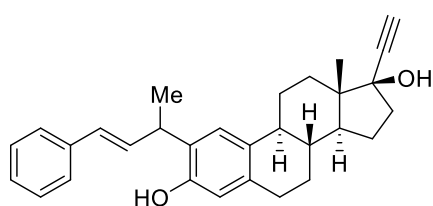

**7,8,9,11,12,13,14,15,16,17-decahydro-6*H*-**

**cyclopenta[*a*]phenanthrene-3,17-diol (3ai)<sup>1</sup>:** white solid

47.3 mg (a mixture of diastereomers), 55% isolated yield;

$^1\text{H}$  NMR (600 MHz,  $\text{CDCl}_3$ , reported as a mixture of diastereomers)  $\delta$  7.36 (d,  $J$  = 7.6 Hz, 2H), 7.29 (t,  $J$  = 7.3 Hz,

2H), 7.23-7.19 (m, 1H), 7.11 (s, 1H), 6.54 (s, 1H), 6.51 (dd,  $J$  = 16.1, 6.2 Hz, 1H), 6.44 (dd,  $J$  = 16.0, 6.1 Hz, 1H), 5.05 (s, 1H), 3.88-3.82 (m, 1H), 2.84-2.75 (m, 2H), 2.60 (d,  $J$  = 2.5 Hz, 1H), 2.39-2.31 (m, 2H), 2.25-2.20 (m, 1H), 2.05-2.00 (m, 2H), 1.93-1.84 (m, 2H), 1.81-1.72 (m, 3H), 1.50-1.33 (m, 7H), 0.88 (s, 3H) ppm;  $^{13}\text{C}$  NMR (150 MHz,  $\text{CDCl}_3$ , reported as a mixture of diastereomers)  $\delta$  151.4, 151.3, 137.1, 136.10, 136.08, 134.25, 134.23, 132.59, 132.58, 129.1, 129.0, 128.5, 128.1, 128.0, 127.2, 126.2, 124.94, 124.93, 116.09, 116.05, 87.41, 87.39, 79.9, 74.1, 49.38, 49.37, 47.1, 43.62, 43.60, 39.38, 39.37, 38.9, 37.1, 36.8, 32.7, 29.2, 27.17, 27.16, 26.44, 26.43, 22.8, 19.61, 19.57, 12.7 ppm.

**(8*R*,9*S*,13*S*,14*S*,17*S*)-13-methyl-2-((*E*)-4-phenylbut-3-en-2-yl)-7,8,9,11,12,13,14,15,16,17-**

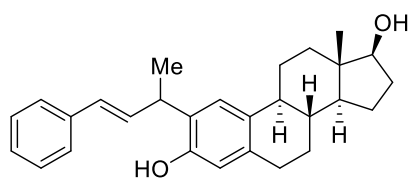

**decahydro-6*H*-cyclopenta[*a*]phenanthrene-3,17-diol (3aj):**

white solid 62.7 mg (a mixture of diastereomers), 78%

isolated yield;  $^1\text{H}$  NMR (600 MHz,  $\text{CDCl}_3$ , reported as a mixture of diastereomers)  $\delta$  7.36 (d,  $J$  = 7.3 Hz, 2H), 7.29 (t,  $J$

= 7.5 Hz, 2H), 7.23-7.20 (m, 1H), 7.11 (s, 1H), 6.54 (s, 1H), 6.52 (dd,  $J$  = 16.1, 5.8 Hz, 1H), 6.44 (dd,  $J$  = 16.0, 6.1 Hz, 1H), 4.96 (s, 1H), 3.87-3.81 (m, 1H), 3.74 (t,  $J$  = 8.6 Hz, 1H), 2.85-2.76 (m, 2H), 2.35-2.30 (m, 1H), 2.22-2.16 (m, 1H), 2.15-2.09 (m, 1H), 1.96-1.93 (m, 1H), 1.88-1.85 (m, 1H), 1.72-1.67 (m, 1H), 1.49-1.47 (m, 4H), 1.44-1.25 (m, 6H), 1.22-1.17 (m, 1H), 0.78 (s, 3H) ppm;  $^{13}\text{C}$  NMR (150 MHz,  $\text{CDCl}_3$ , reported as a mixture of diastereomers)  $\delta$  151.4, 151.3, 137.1, 136.19, 136.16, 134.22, 134.21, 132.74, 132.72, 129.14, 129.07, 128.5, 128.01, 127.97, 127.2, 126.2, 124.94, 124.93, 116.12, 116.08, 81.9, 49.96, 49.95, 44.1, 44.0, 43.22, 43.21, 38.83, 38.82, 37.2, 36.9, 36.7, 30.6, 29.2, 27.19, 27.18, 26.38, 26.37, 23.1, 19.58, 19.57, 11.1 ppm. **HRMS (APCI)** calculated  $[\text{M}+\text{H}]^+$  for  $\text{C}_{28}\text{H}_{35}\text{O}_2$  = 403.2632, found: 403.2628.



### 3. Deuterium-labeled experiments

Scheme S2. Synthesis of **2a-d**.<sup>4</sup>

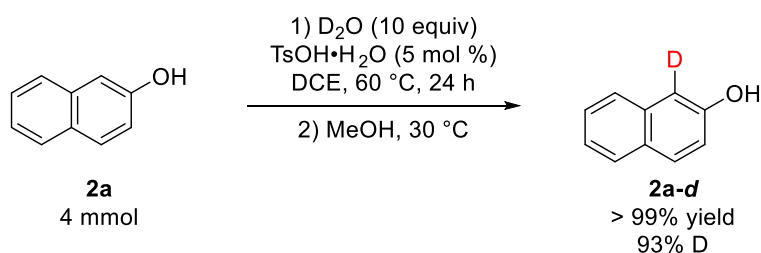

Under nitrogen atmosphere, 2-naphthol **2a** (576.7 mg, 4 mmol) was treated with 10 equiv of 99.8% D<sub>2</sub>O (800 µL, 40 mmol) in the presence of 5 mol % *p*-toluenesulfonic acid catalyst (38.0 mg, 0.2 mmol) at 60 °C for 24 h in 3 mL dry 1,2-dichloroethane solvent. Then the resulting mixture was cooled to room temperature, the layers were separated and the aqueous phase extracted with ethyl acetate (3×10 mL). The combined organic phases dried over Na<sub>2</sub>SO<sub>4</sub> and concentrated in vacuo. Subsequently, 2 mL MeOH was added and the mixture was concentrated using rotatory evaporator (400 mbar) for 6 minutes (this process was repeated three times). Selective deuterium incorporation was observed exclusively at the C1-position of **2a** to produce **2a-d** with quantitative (>99%) yield. <sup>1</sup>H NMR spectrum showed 93% D incorporation. <sup>1</sup>H NMR (400 MHz, CDCl<sub>3</sub>) δ 7.78-7.74 (m, 2H), 7.68 (d, *J* = 8.2 Hz, 1H), 7.43 (t, *J* = 7.5 Hz, 1H), 7.33 (t, *J* = 7.5 Hz, 1H), 7.15 (d, *J* = 2.4 Hz, 0.07H), 7.10 (d, *J* = 8.9 Hz, 1H), 4.98 (s, 1H) ppm.

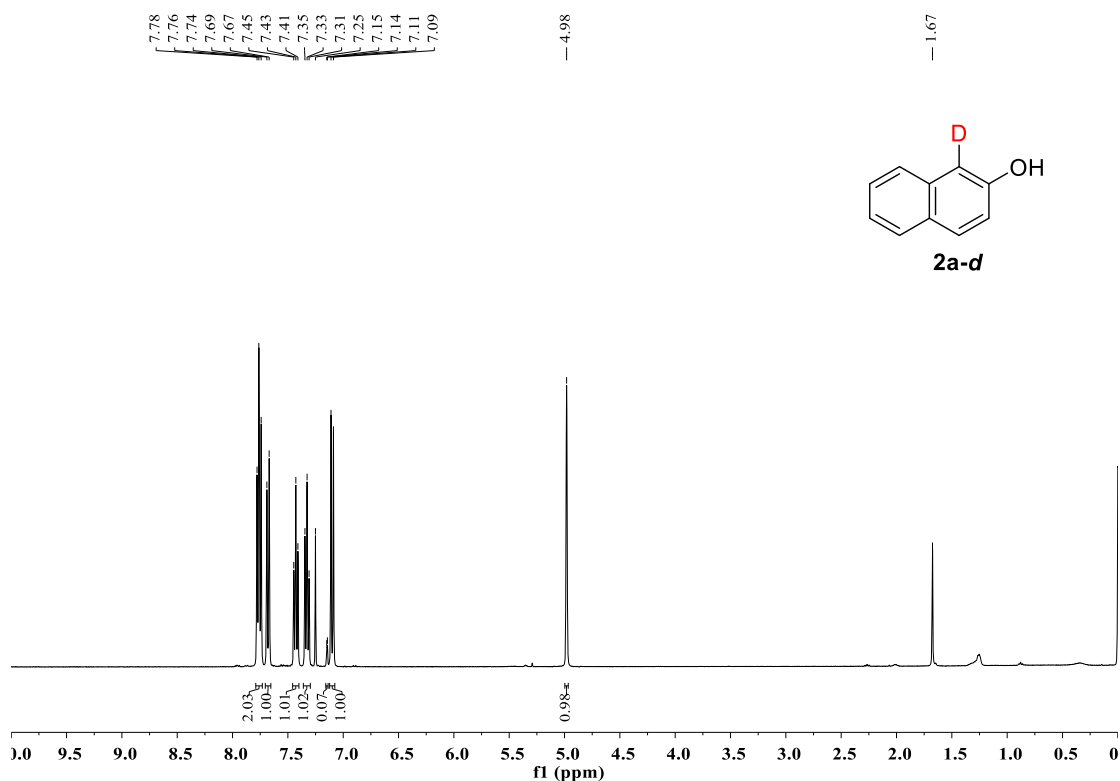

Figure S1. <sup>1</sup>H NMR spectra of **2a-d**.

**Scheme S3.** Synthesis of **2a'-d**.

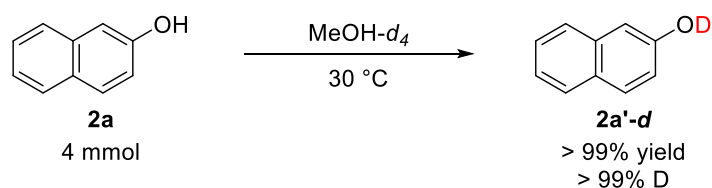

An oven dried flask (20 mL) was rinsed with MeOH- $d_4$  twice, and then charged with 2-naphthol **2a** (576.7 mg, 4 mmol). MeOH- $d_4$  (99.8 % D, 2 mL) was added and the mixture was concentrated using rotatory evaporator (400 mbar) for 6 minutes (this process was repeated six times); The residual solvent was evaporated with high vacuum and resulted in quantitative (>99%) yield of the title compound **2a'-d**.  $^1\text{H}$  NMR spectrum showed > 99% D incorporation.  $^1\text{H}$  NMR (400 MHz, MeOH- $d_4$ )  $\delta$  7.70 (t,  $J$  = 7.7 Hz, 2H), 7.62 (d,  $J$  = 8.3 Hz, 1H), 7.35 (ddd,  $J$  = 8.3, 6.8, 1.4 Hz, 1H), 7.23 (ddd,  $J$  = 8.2, 6.9, 1.4 Hz, 1H), 7.10 (s, 1H), 7.06 (dd,  $J$  = 8.8, 2.4 Hz, 1H) ppm.

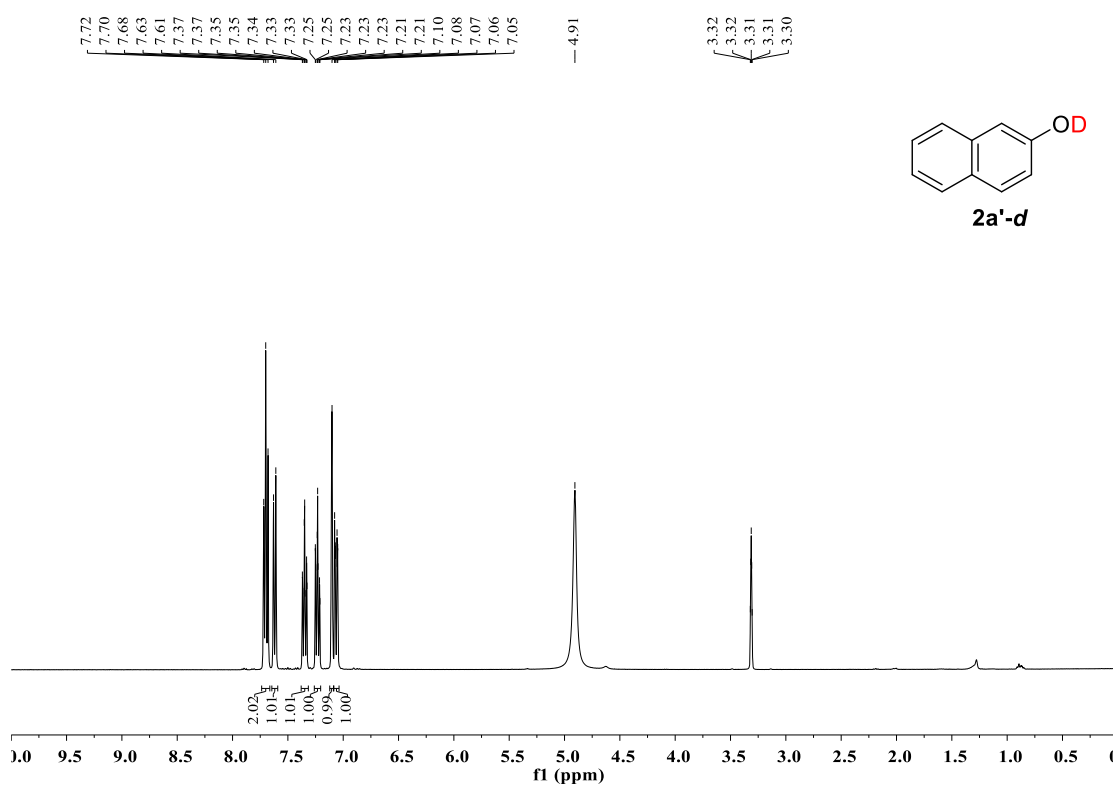

**Figure S2.**  $^1\text{H}$  NMR spectra of **2a'-d**.

**Scheme S4.** Synthesis of **3aa-d**.

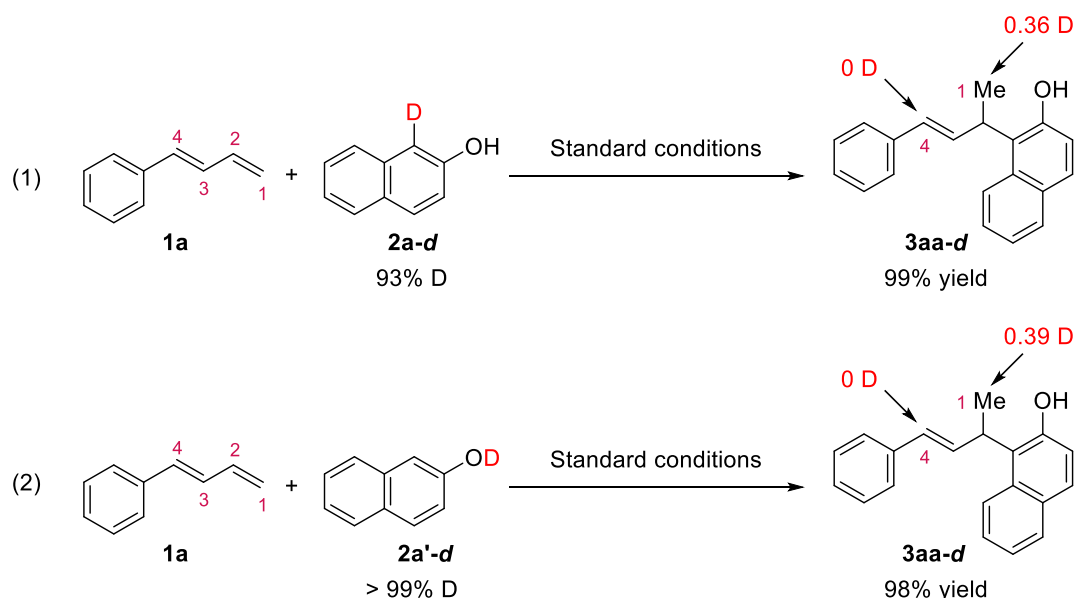

The deuterium-labeled experiments were carried out with 1,3-dienes **1a** and deuterium-labeled 2-naphthol **2a-d** or **2a'-d** under the standard conditions, the desired C-H allylated products **3aa-d** were obtained with 99% or 98% yield, respectively. The **3aa-d** were determined by  $^1\text{H}$  NMR and  $^2\text{H}$  NMR analysis. Deuterium incorporation was determined by  $^1\text{H}$  NMR.

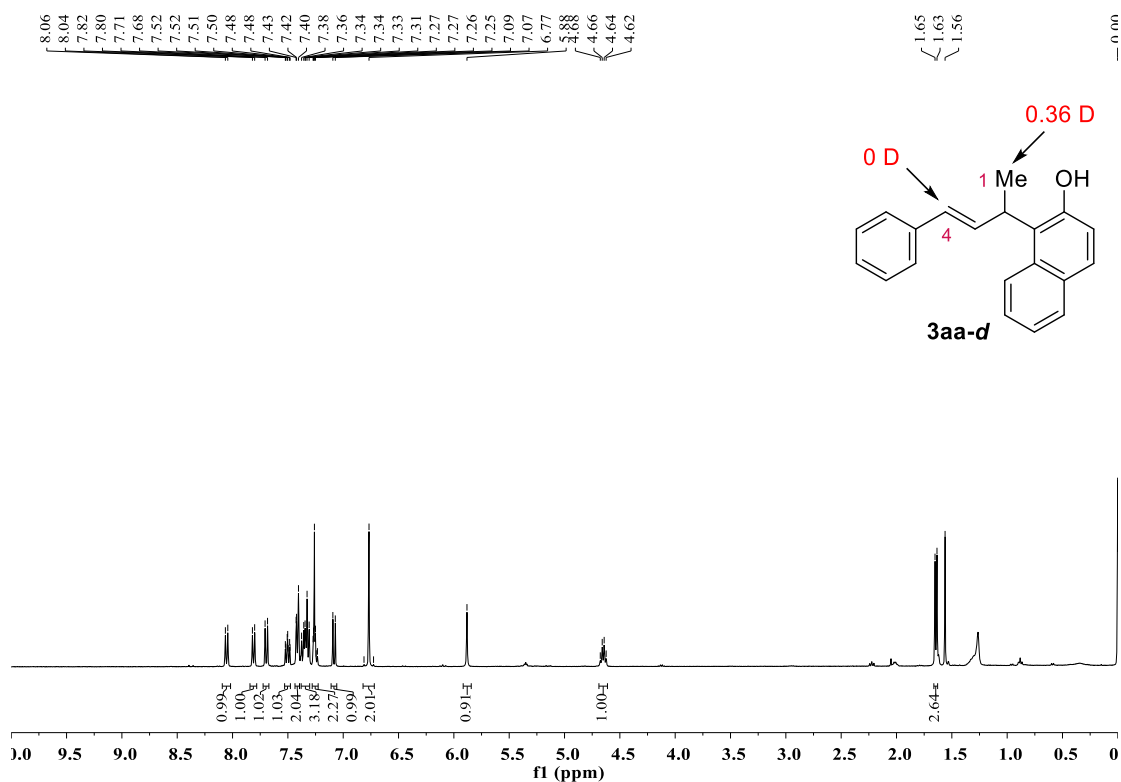

Figure S3.  $^1\text{H}$  NMR spectra of **3aa-d** (from **2a-d**).

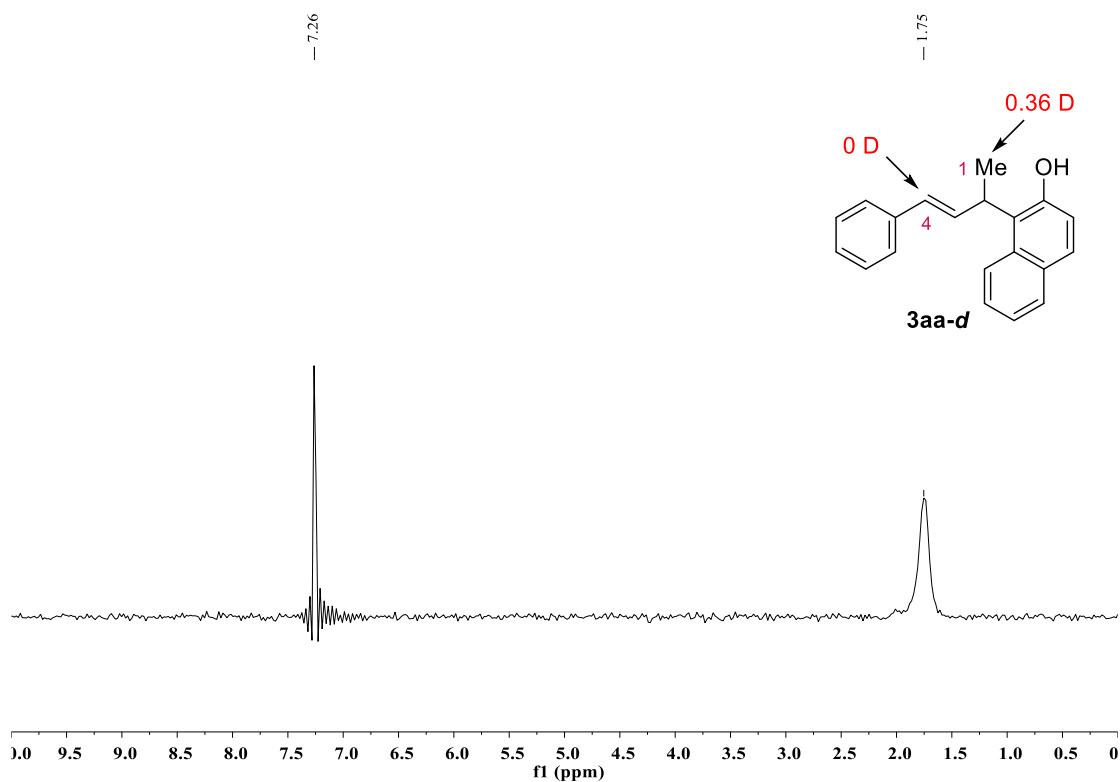

Figure S4.  $^2\text{H}$  NMR spectra of **3aa-d** (from **2a-d**).

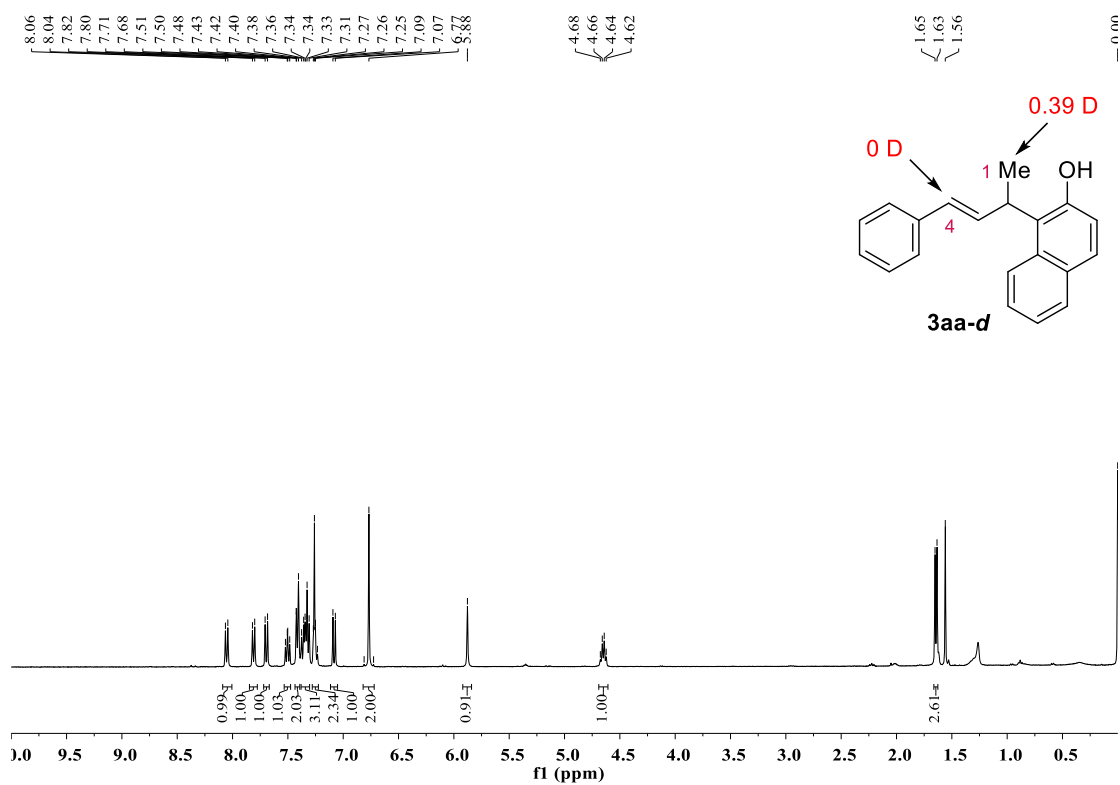

Figure S5.  $^1\text{H}$  NMR spectra of **3aa-d** (from **2a'-d**).

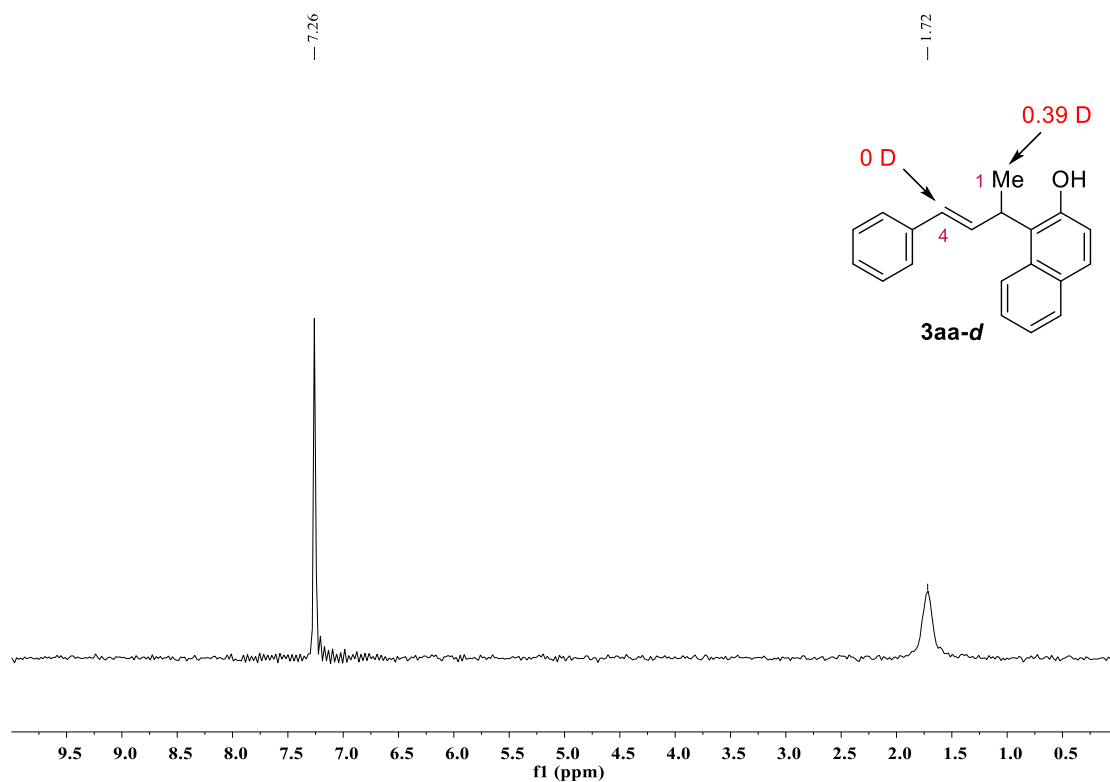

**Figure S6.**  $^2\text{H}$  NMR spectra of **3aa-d** (from **2a'-d**).

#### 4. References

1. G. Wang, L. Gao, H. Chen, X. Liu, J. Cao, S. Chen, X. Cheng and S. Li, Chemoselective borane-catalyzed hydroarylation of 1,3-dienes with phenols, *Angew. Chem. Int. Ed.*, 2019, **58**, 1694-1699.
2. M. Niggemann and M. J. Meel, Calcium-catalyzed Friedel-Crafts alkylation at room temperature, *Angew Chem Int Ed*, 2010, **49**, 3684-3687.
3. Z. Liu, G. Li, T. Yao, J. Zhang and L. Liu, Triflic acid-catalyzed chemo- and site-selective C-H bond functionalization of phenols with 1,3-dienes, *Adv. Synth. Catal.*, 2021, **363**, 2740-2745.
4. A. K. Mishra and S. Biswas, Bronsted acid catalyzed functionalization of aromatic alcohols through nucleophilic substitution of hydroxyl group, *J. Org. Chem.*, 2016, **81**, 2355-2363.

## 5. NMR spectra

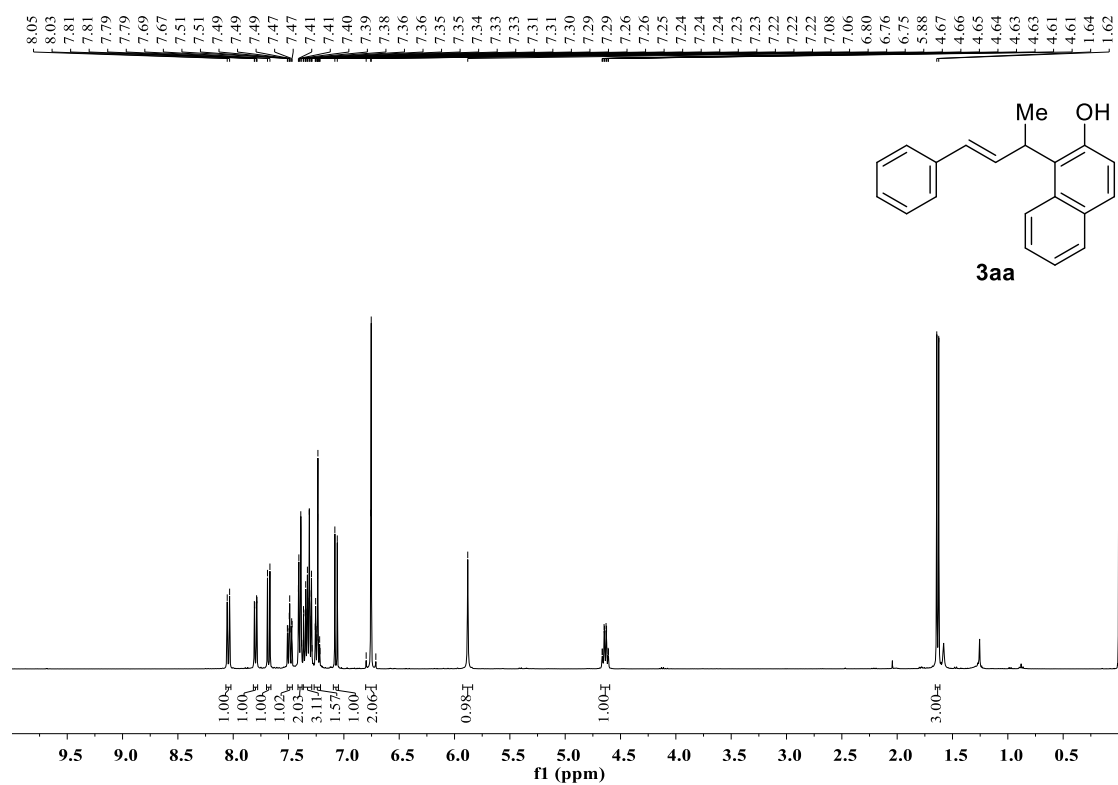

Figure S7. <sup>1</sup>H NMR spectra of **3aa**.

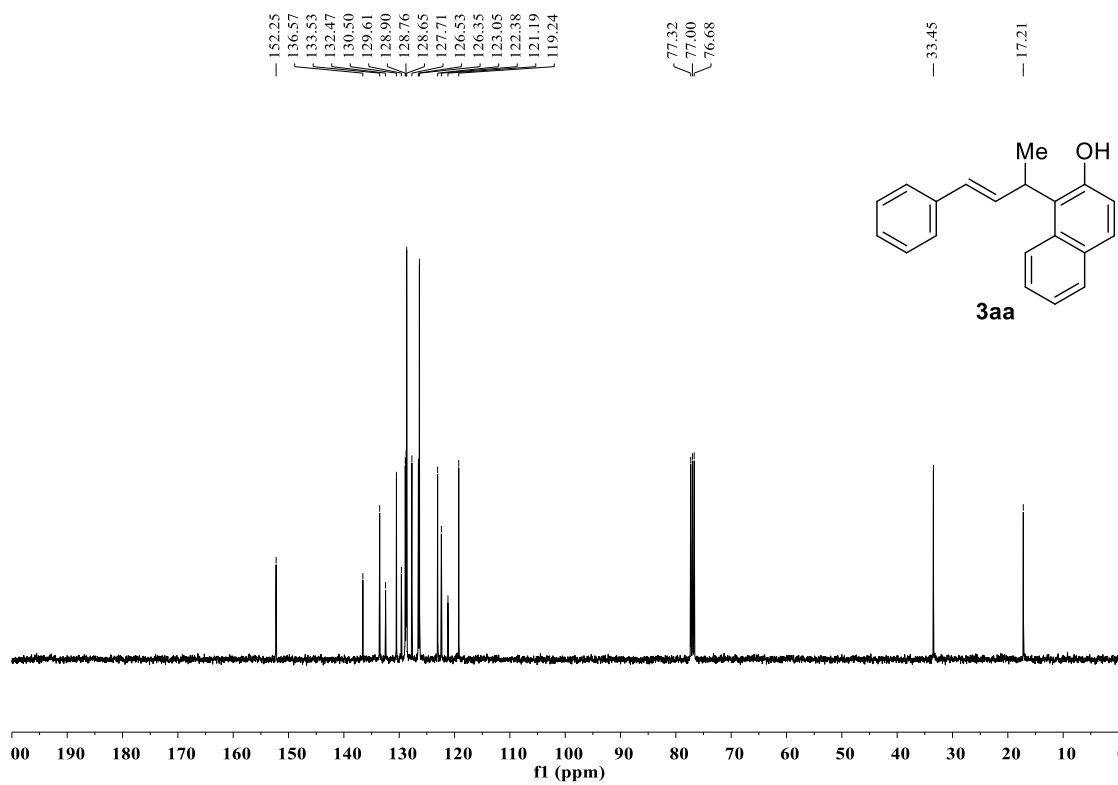

Figure S8. <sup>13</sup>C NMR spectra of **3aa**.

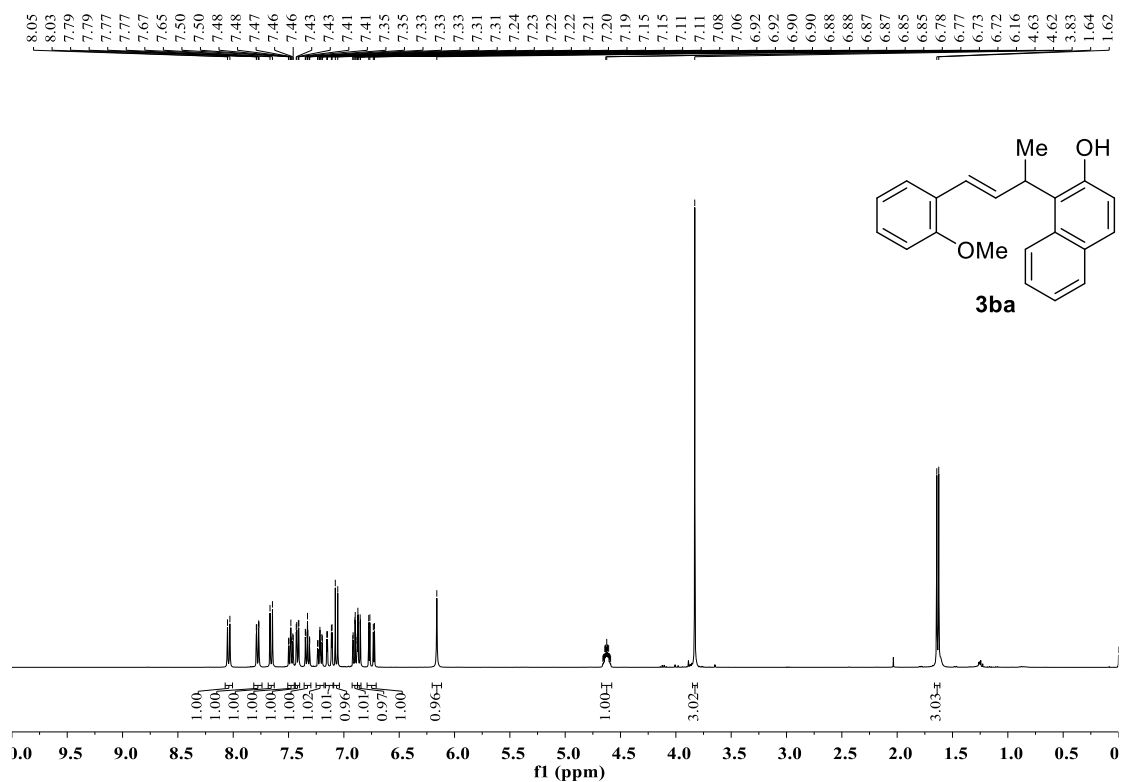

Figure S9. <sup>1</sup>H NMR spectra of **3ba**.

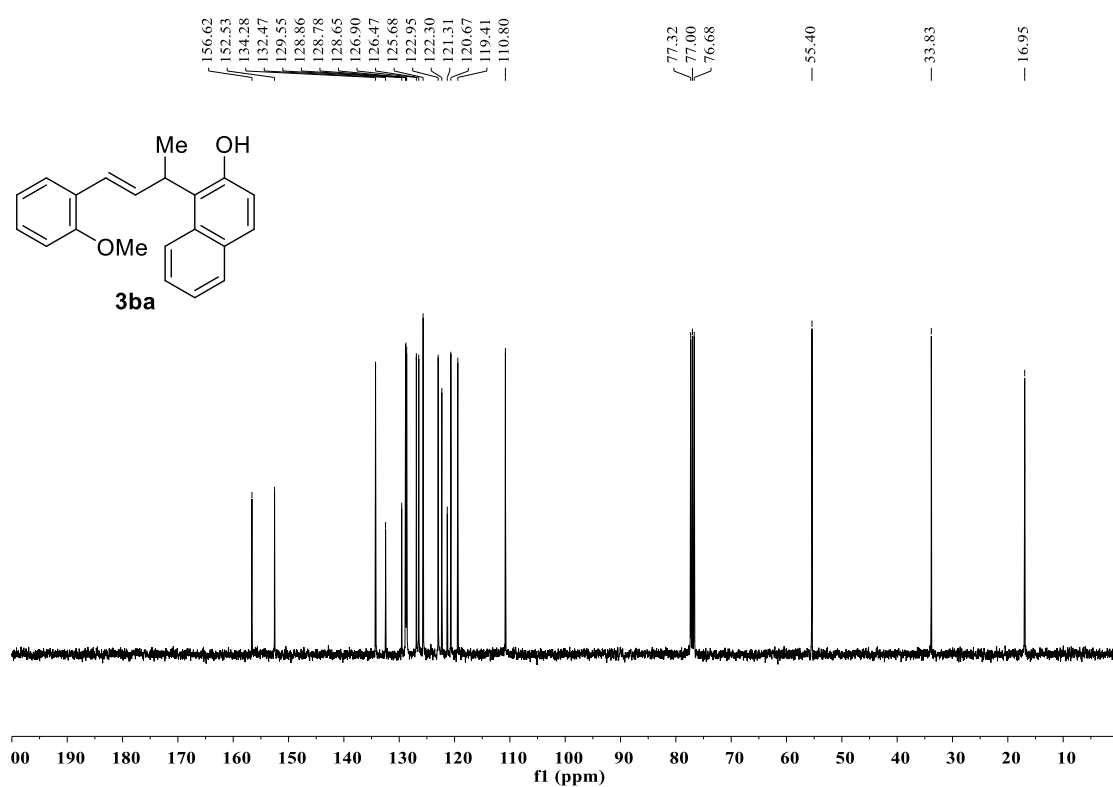

Figure S10. <sup>13</sup>C NMR spectra of **3ba**.

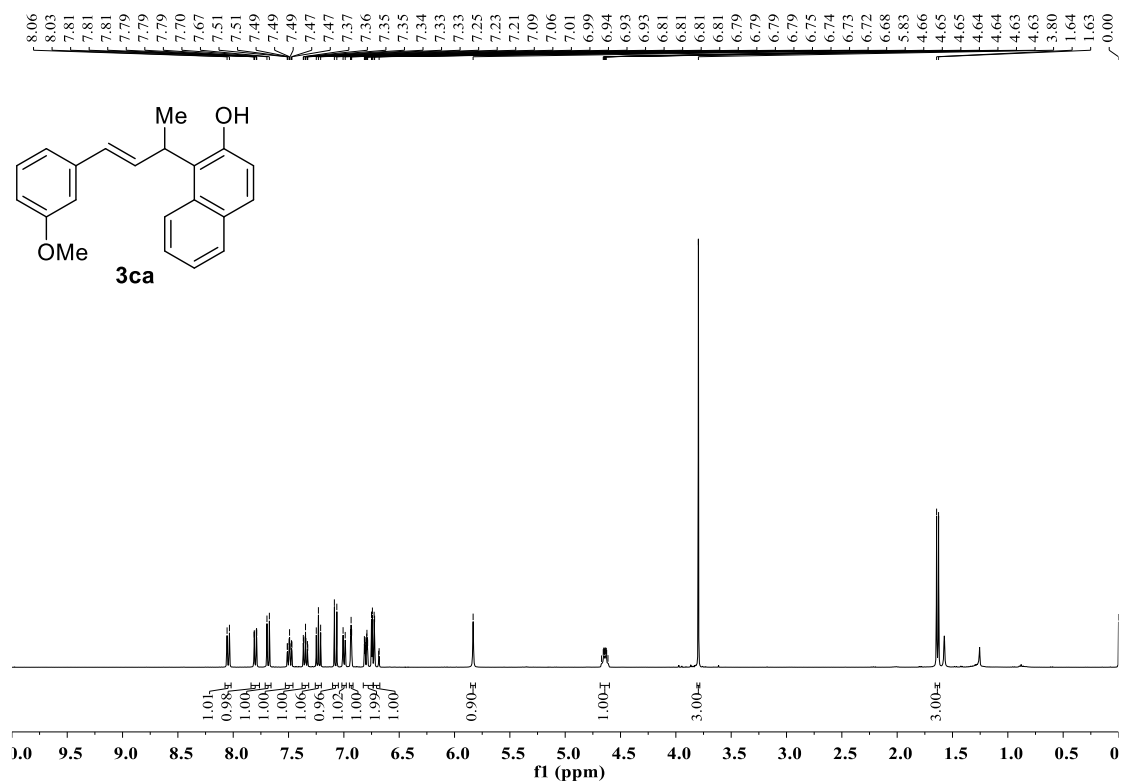

Figure S11. <sup>1</sup>H NMR spectra of 3ca.

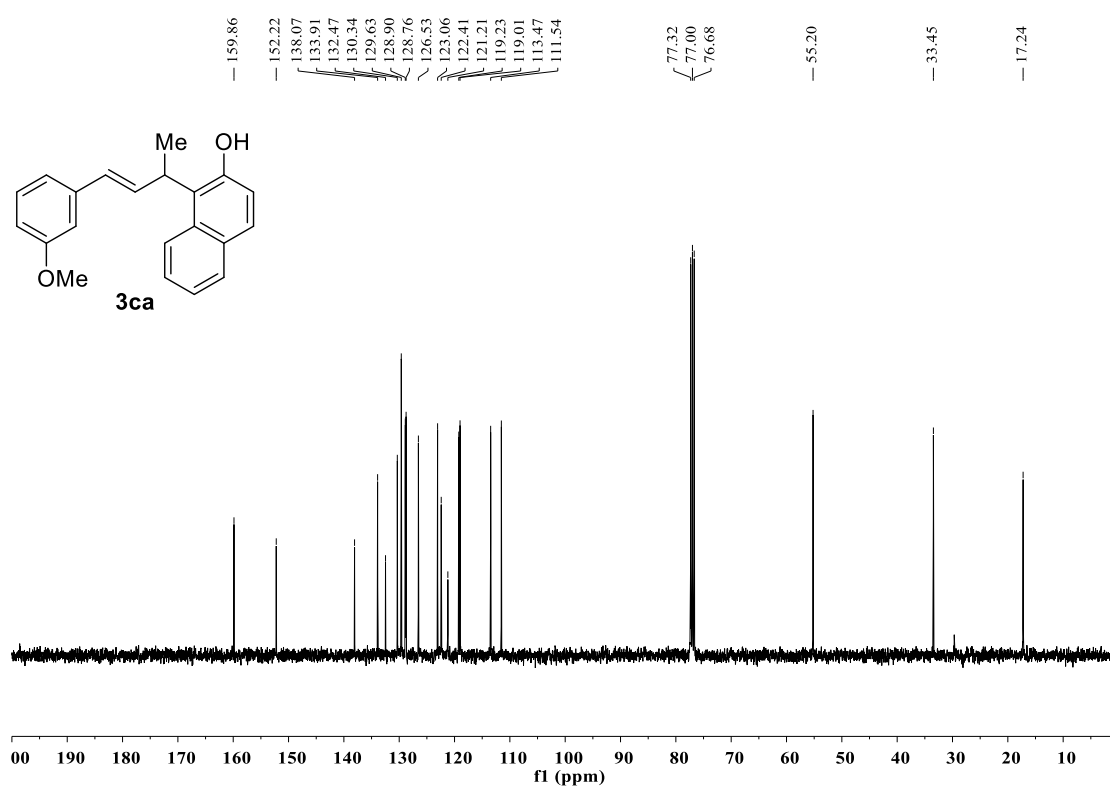

Figure S12. <sup>13</sup>C NMR spectra of 3ca.



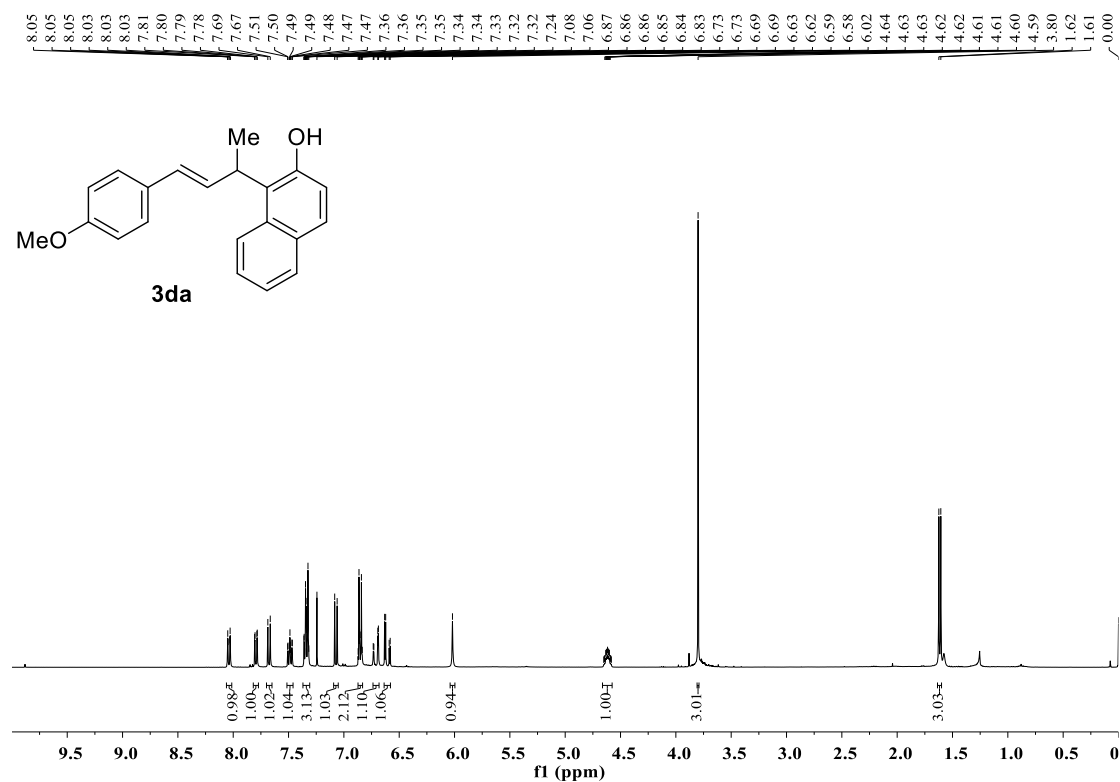

Figure S13. <sup>1</sup>H NMR spectra of **3da**.

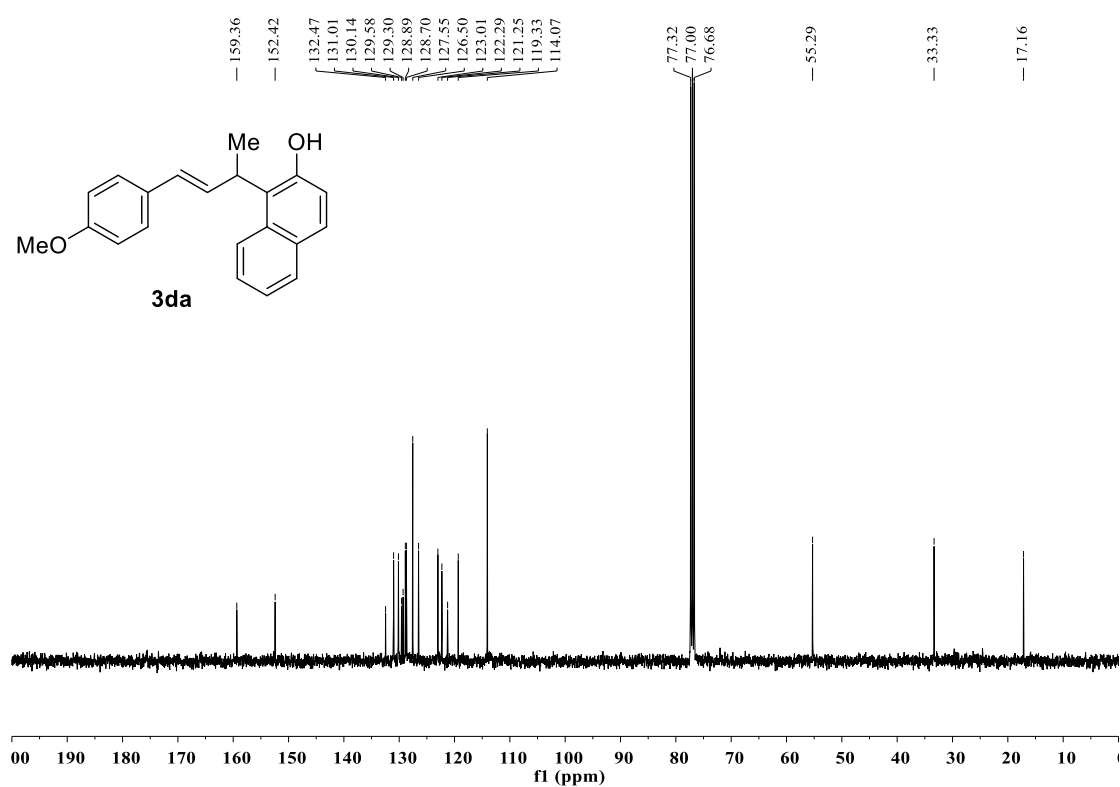

Figure S14. <sup>13</sup>C NMR spectra of **3da**.

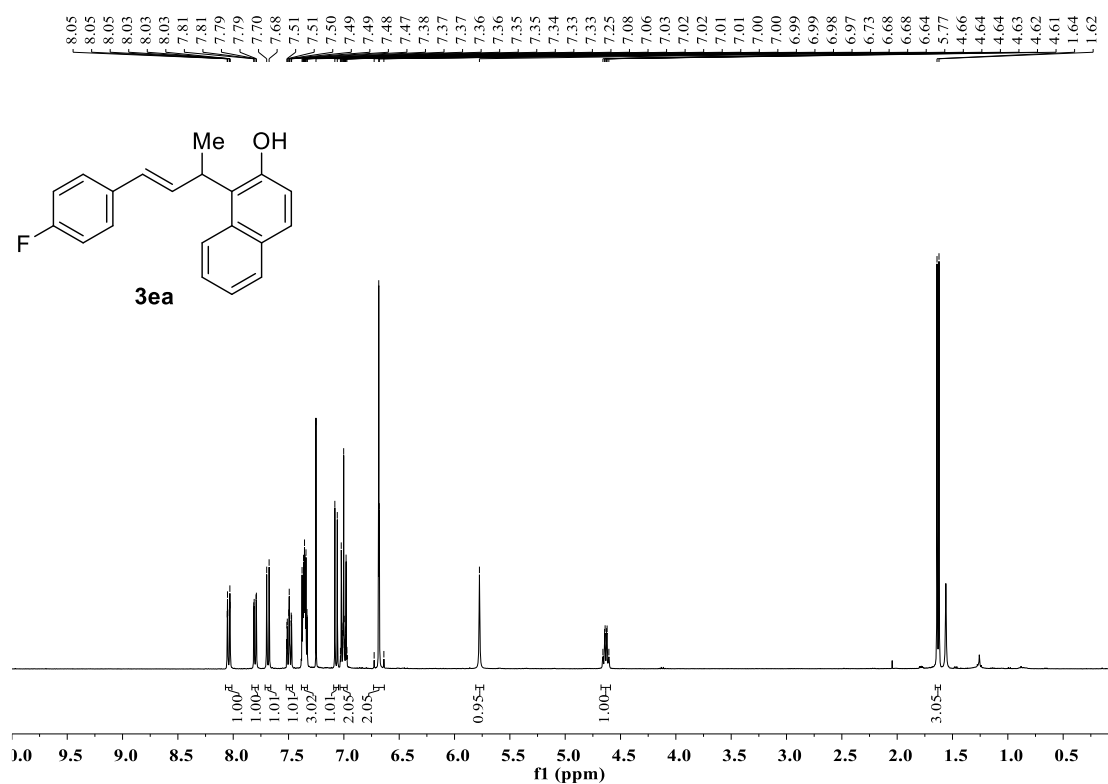

Figure S15. <sup>1</sup>H NMR spectra of 3ea.

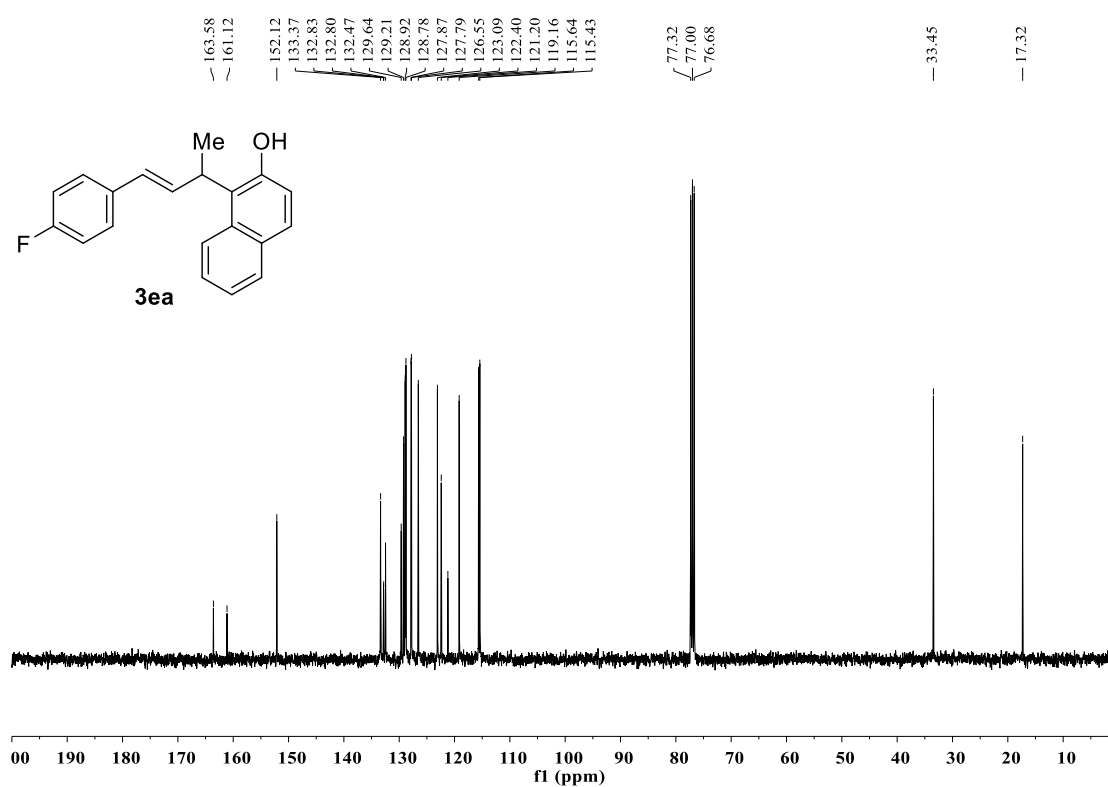

Figure S16. <sup>13</sup>C NMR spectra of 3ea.

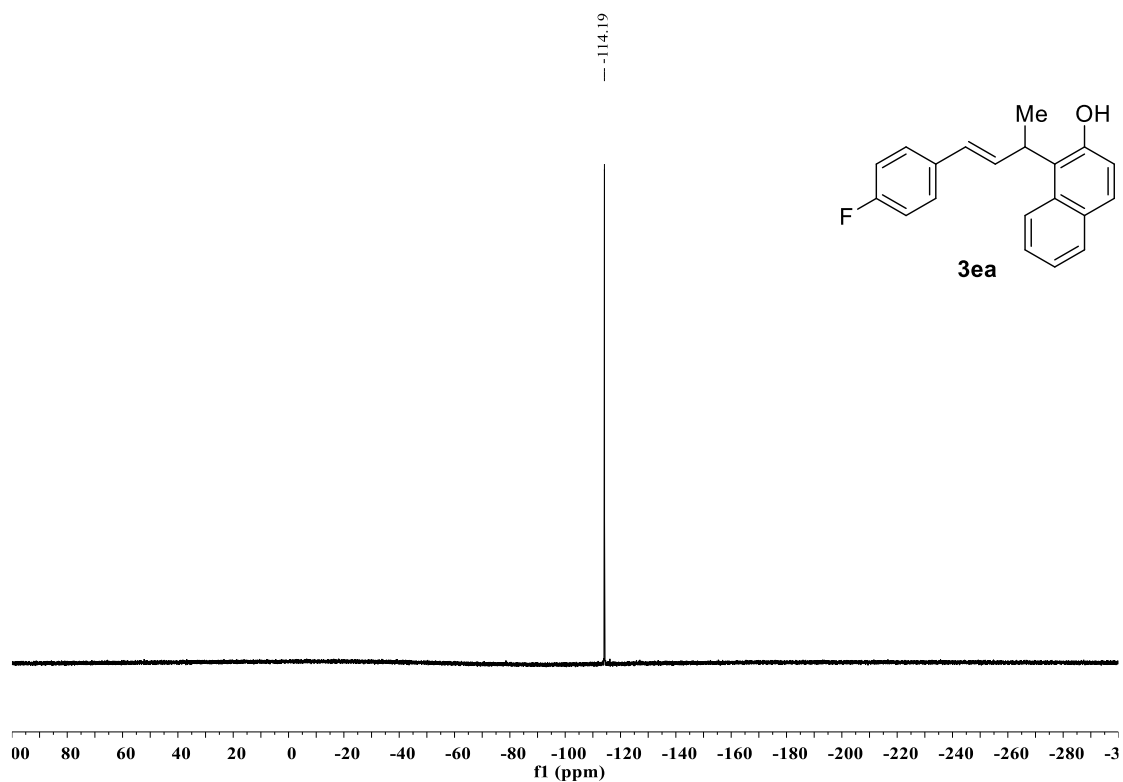

Figure S17. <sup>19</sup>F NMR spectra of **3ea**.

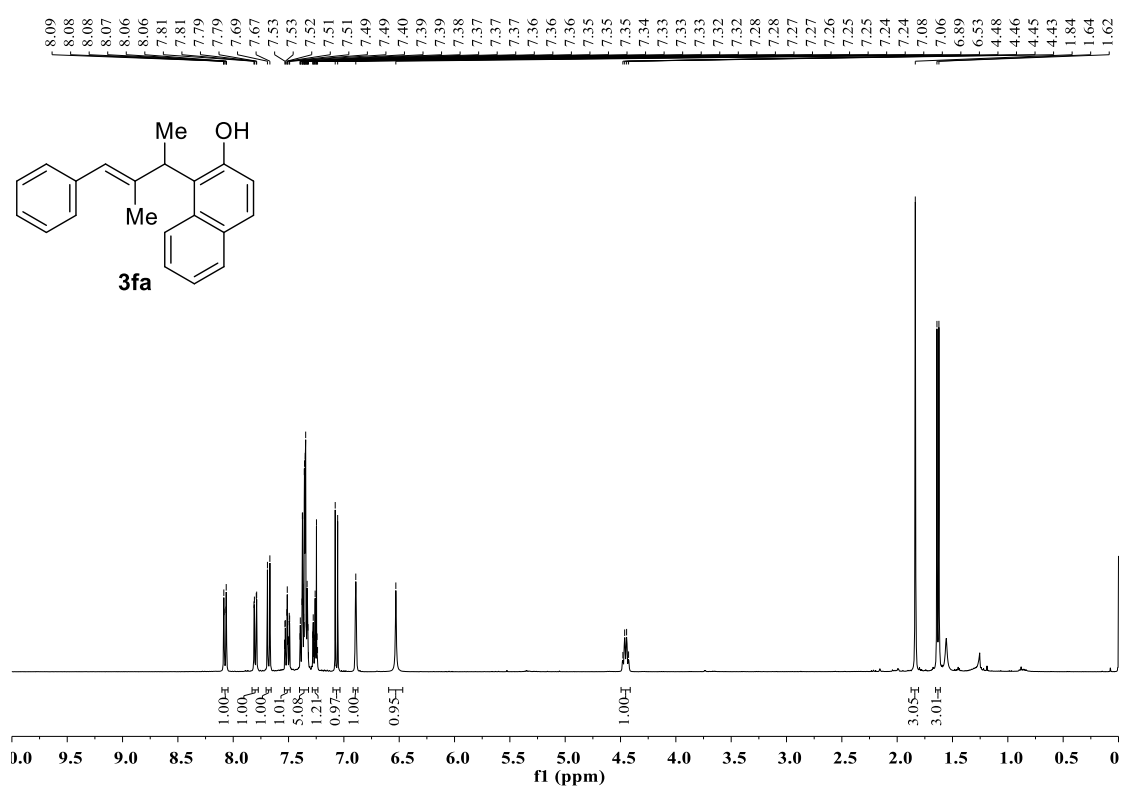

Figure S18. <sup>1</sup>H NMR spectra of **3fa**.

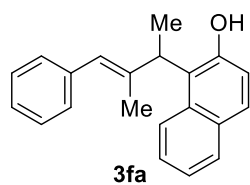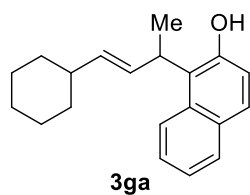

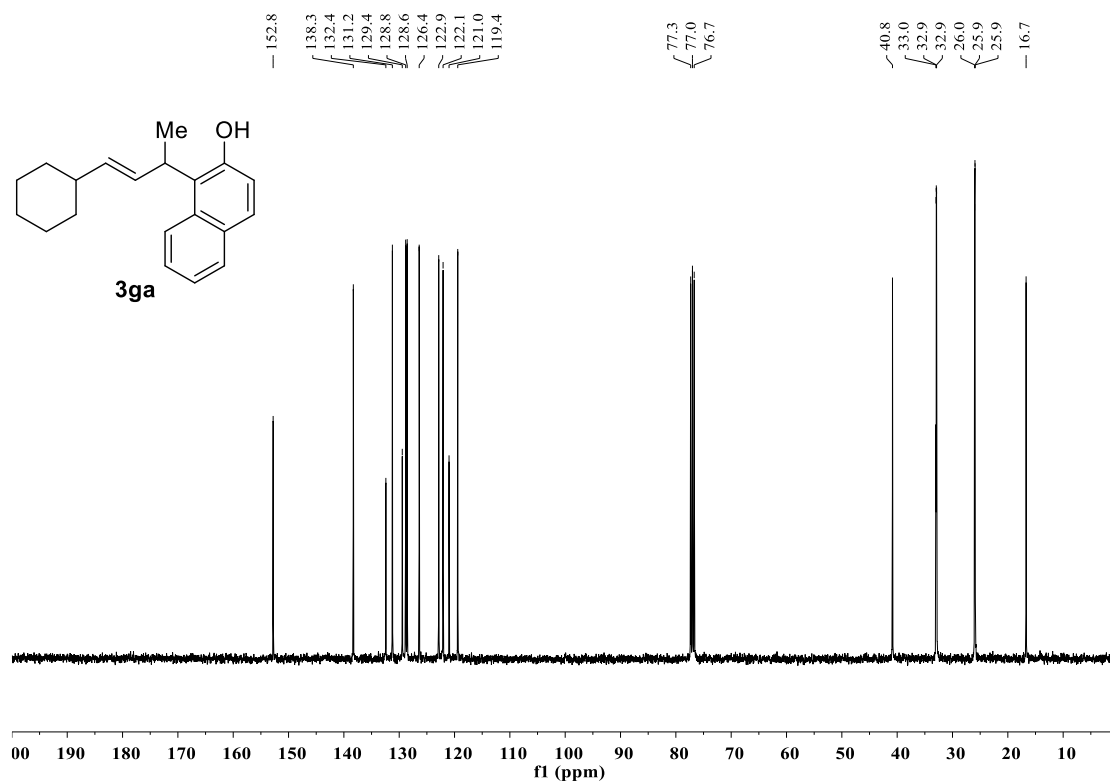

Figure S21. <sup>13</sup>C NMR spectra of **3ga**.

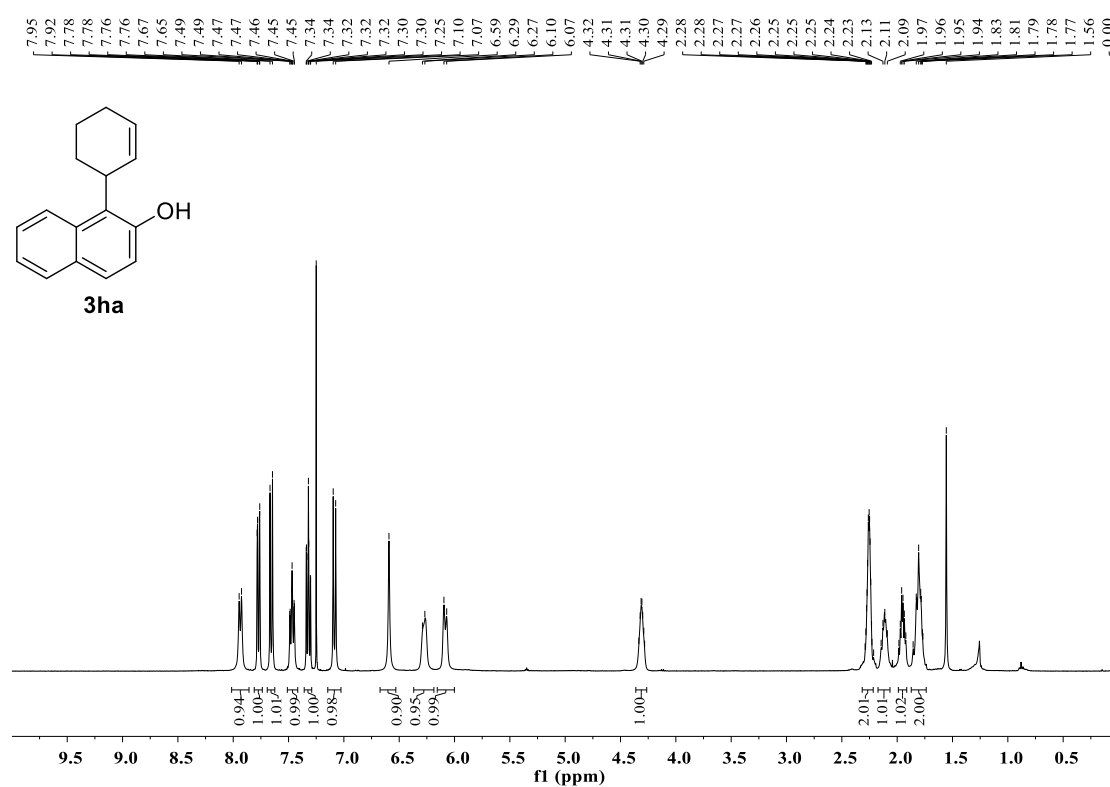

Figure S22. <sup>1</sup>H NMR spectra of **3ha**.

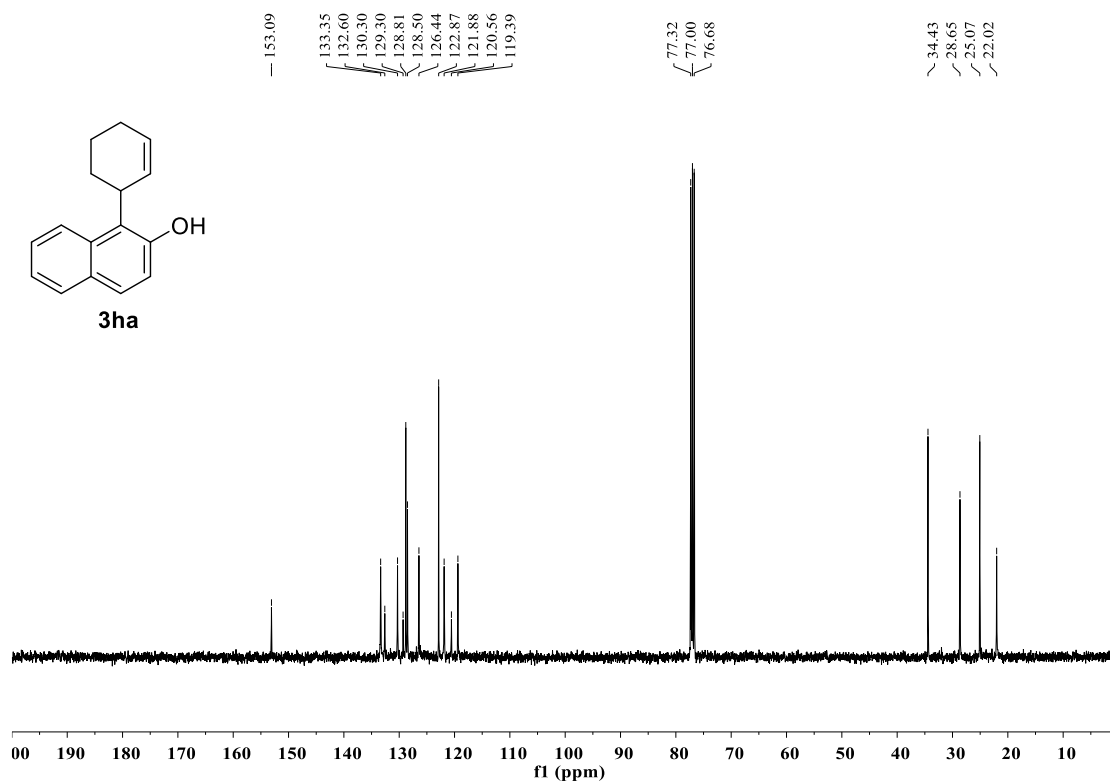

Figure S23.  $^{13}\text{C}$  NMR spectra of **3ha**.

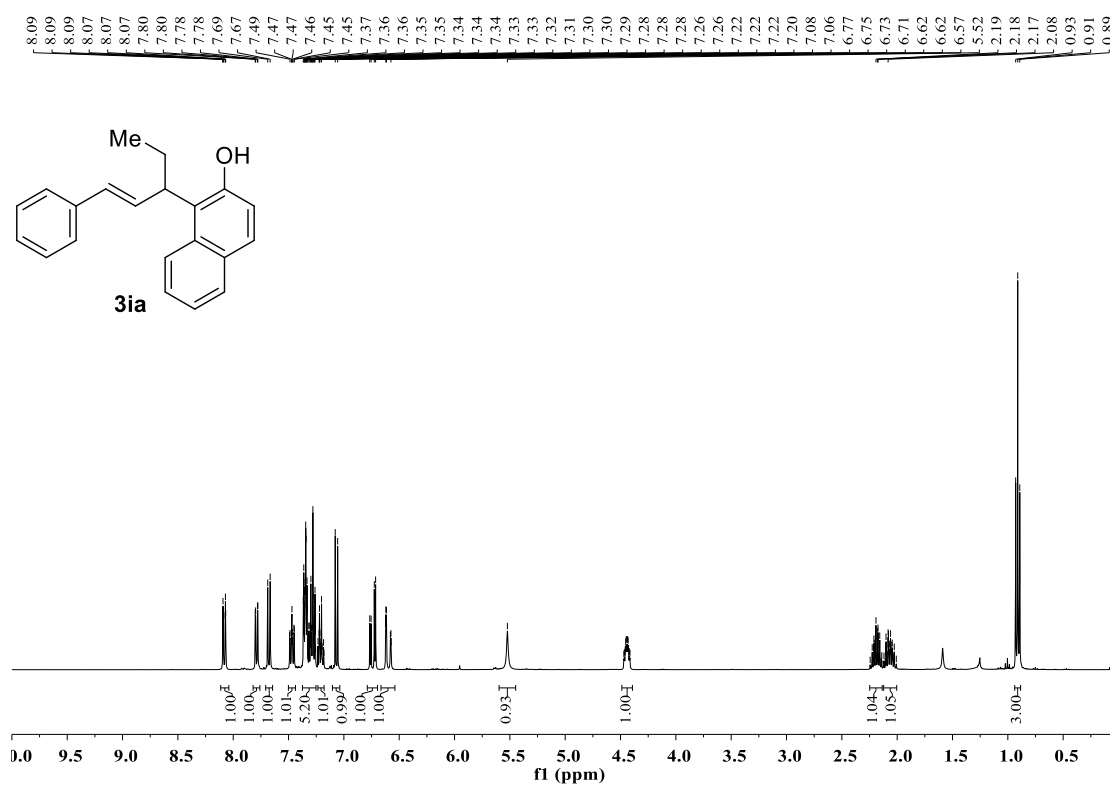

Figure S24.  $^1\text{H}$  NMR spectra of **3ia**.

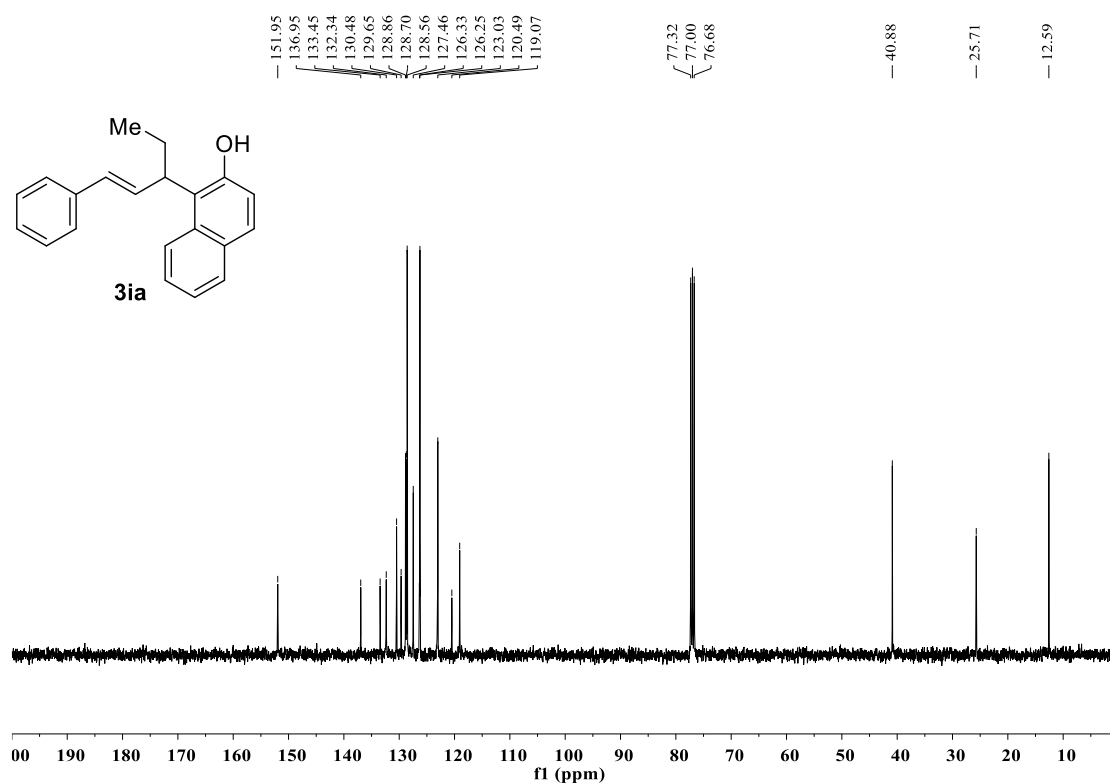

Figure S25.  $^{13}\text{C}$  NMR spectra of **3ia**.

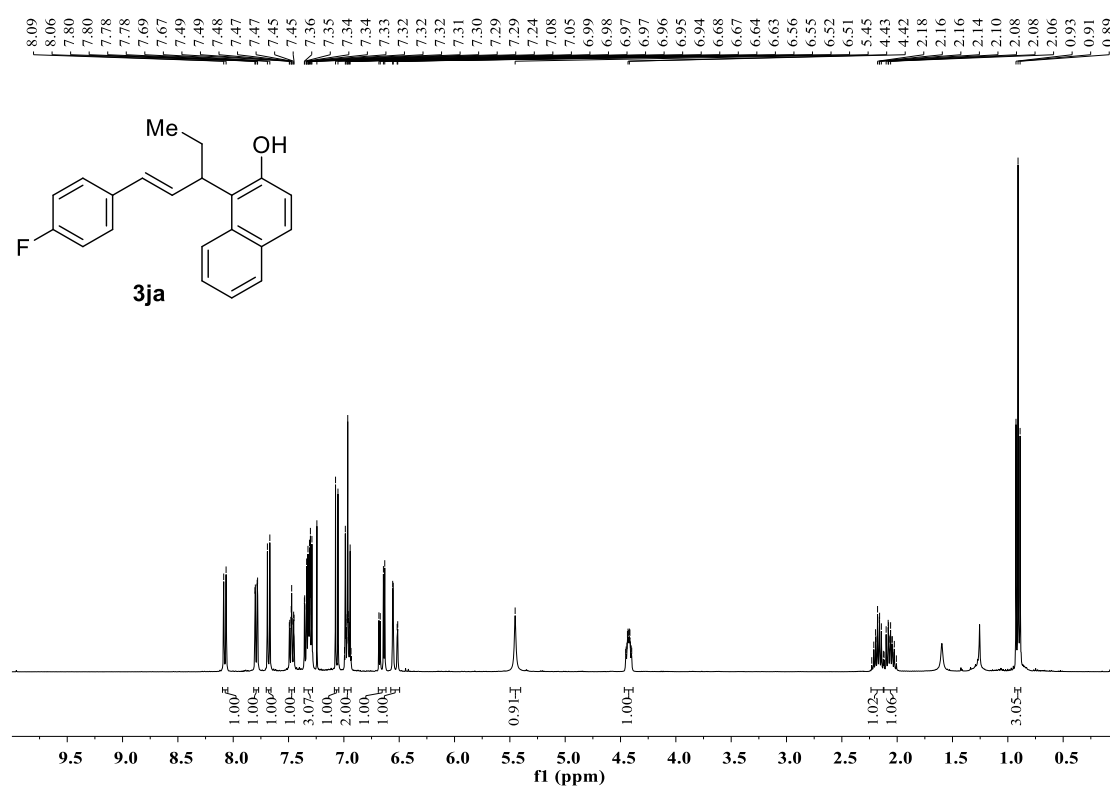

Figure S26.  $^1\text{H}$  NMR spectra of **3ja**.

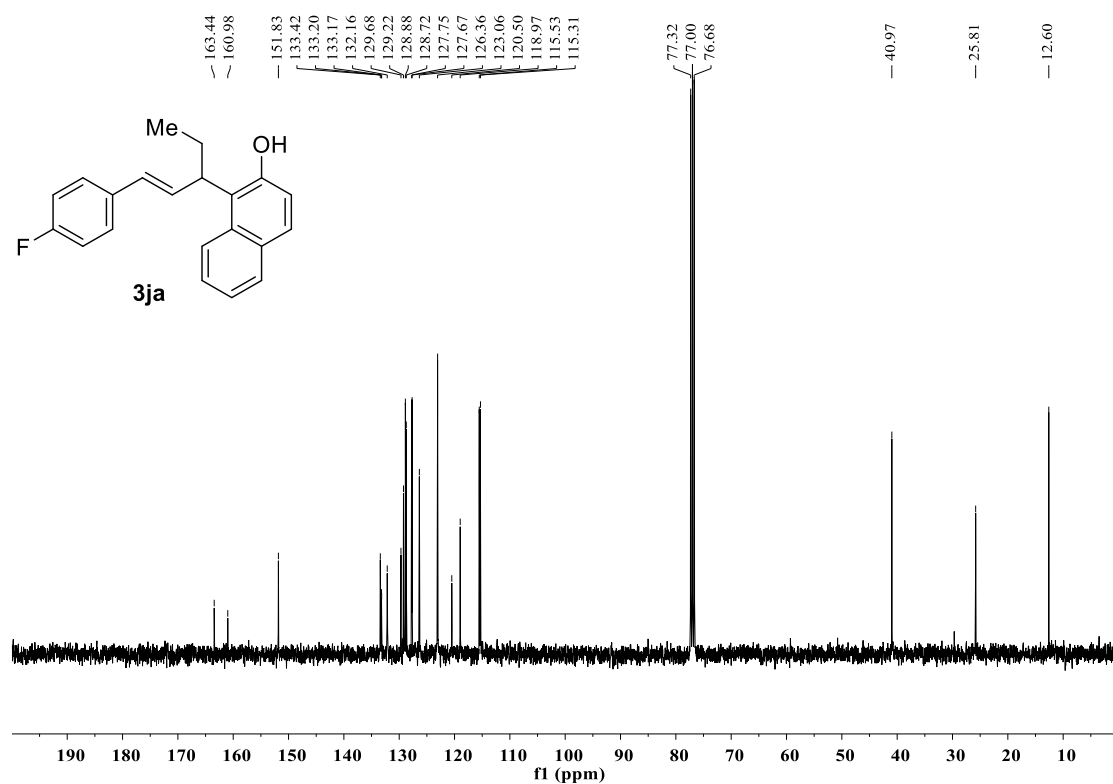

Figure S27. <sup>13</sup>C NMR spectra of **3ja**.

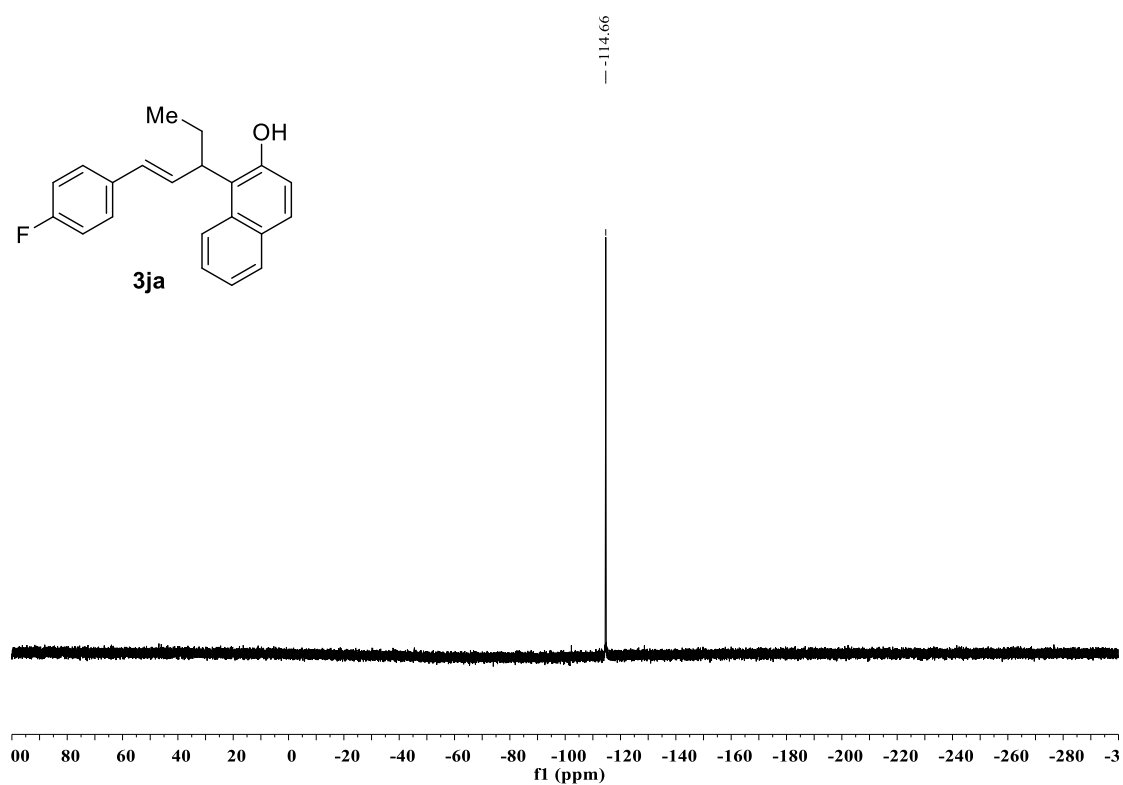

Figure S28. <sup>19</sup>F NMR spectra of **3ja**.





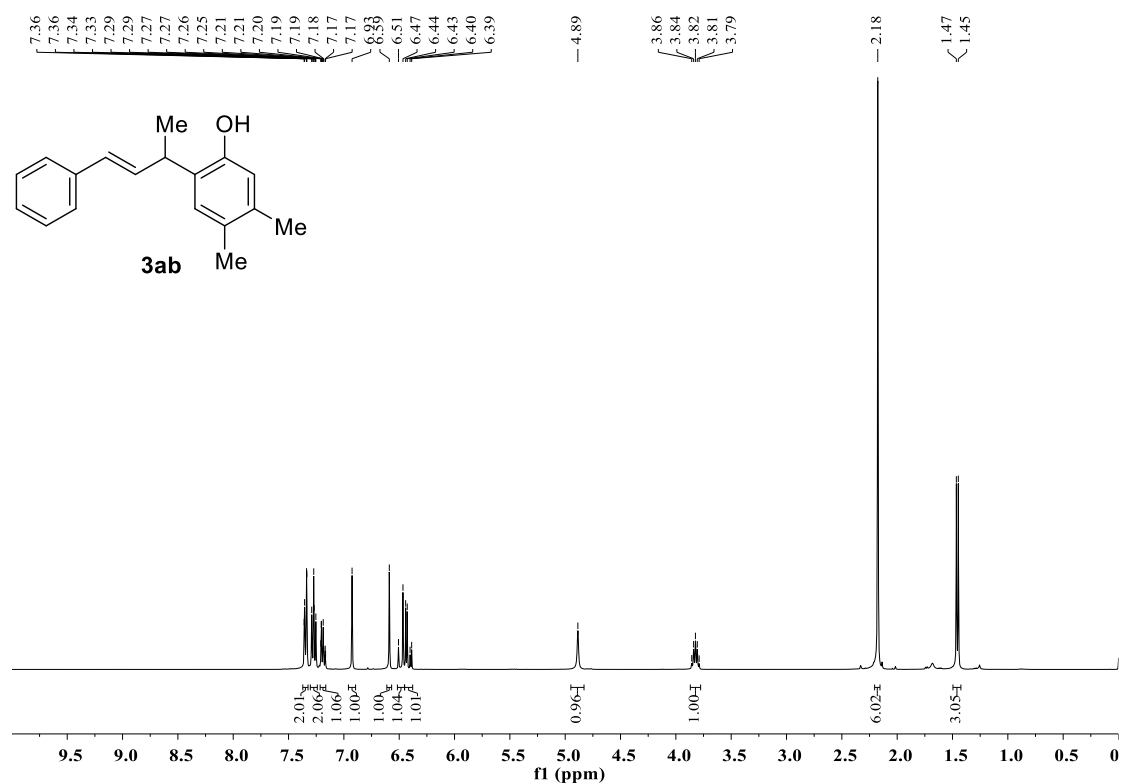

Figure S31. <sup>1</sup>H NMR spectra of **3ab**.

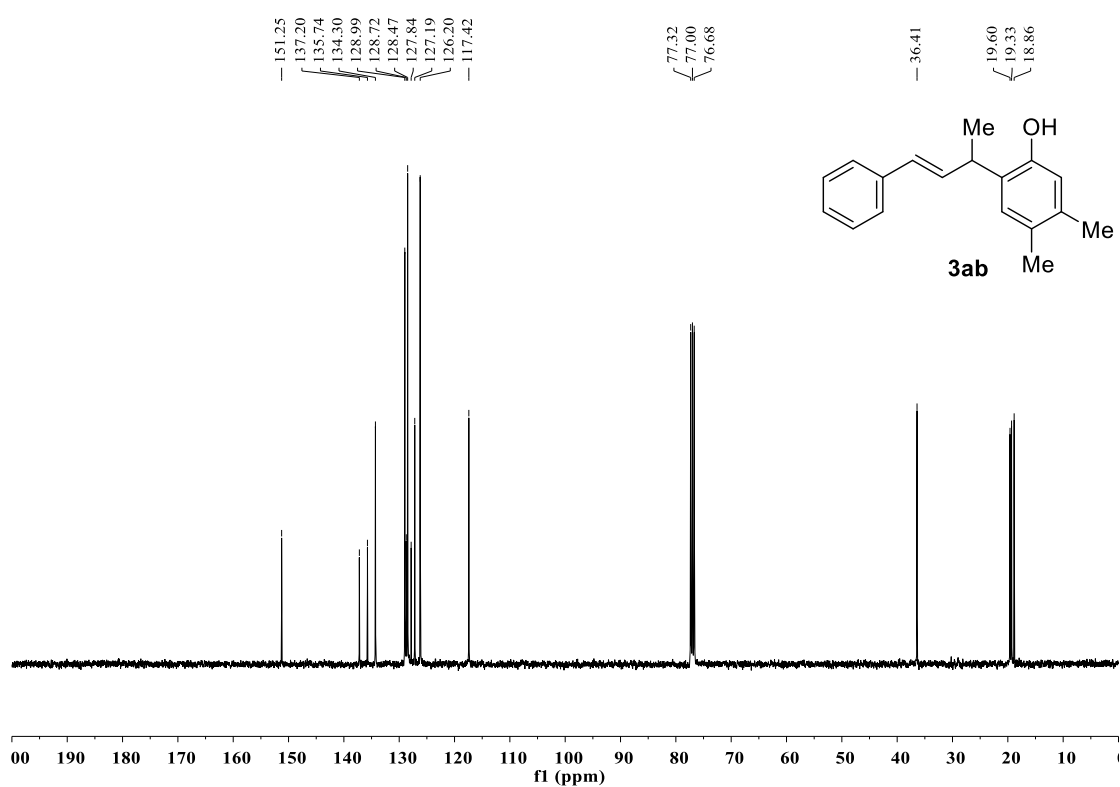

Figure S32. <sup>13</sup>C NMR spectra of **3ab**.

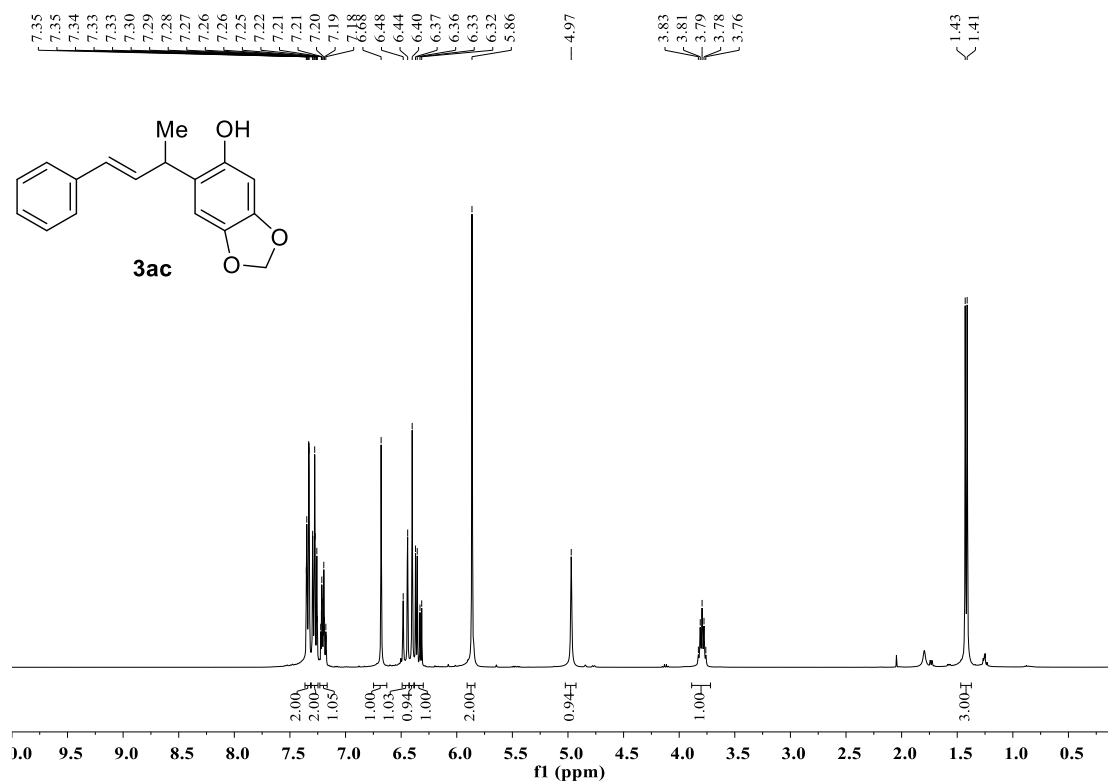

Figure S33. <sup>1</sup>H NMR spectra of 3ac.

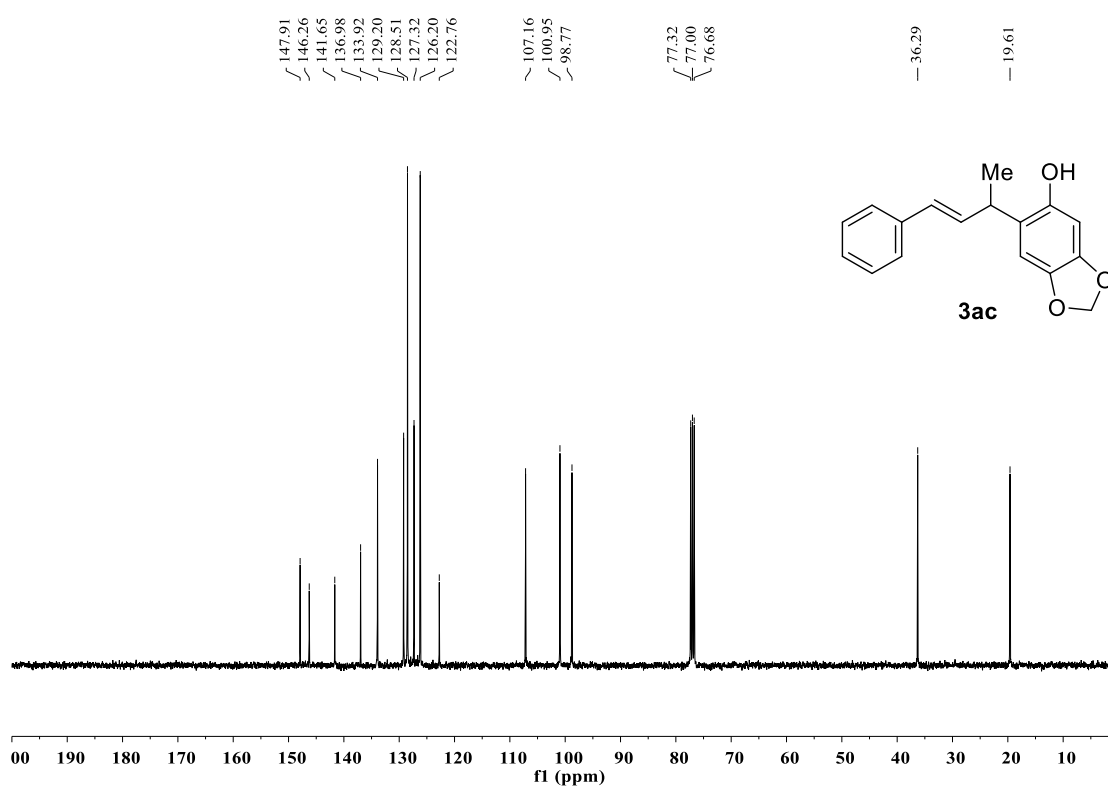

Figure S34. <sup>13</sup>C NMR spectra of 3ac.

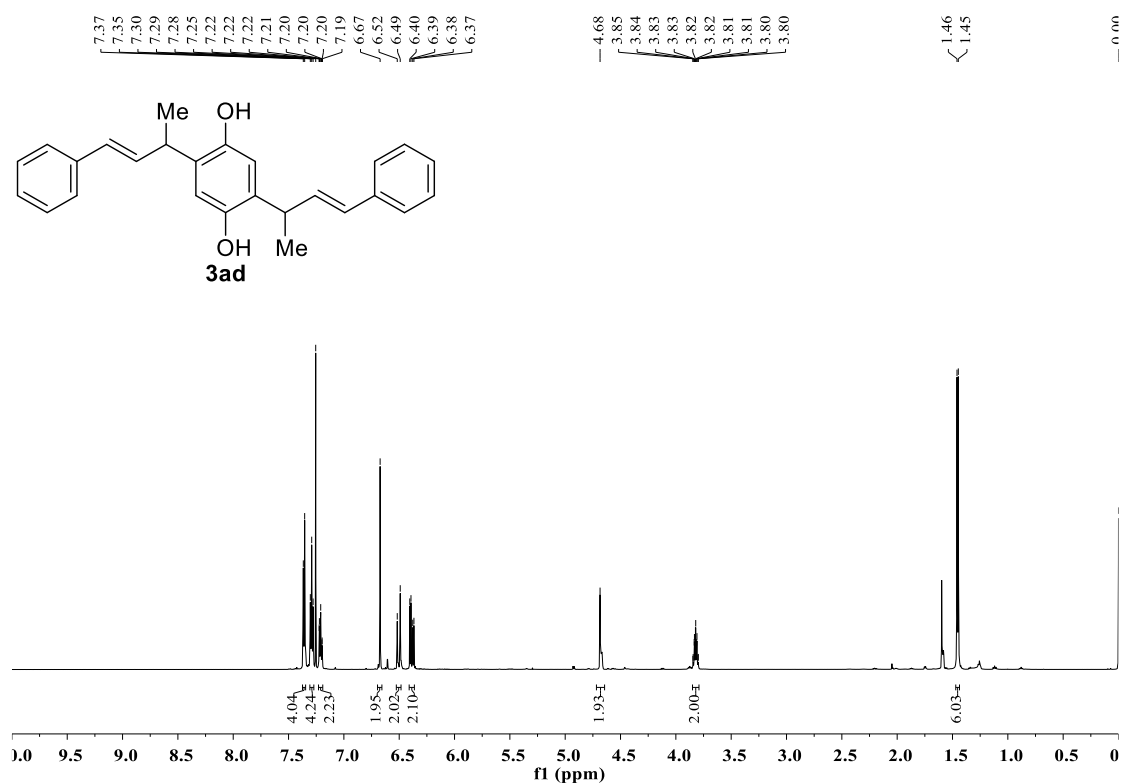

Figure S35. <sup>1</sup>H NMR spectra of **3ad**.

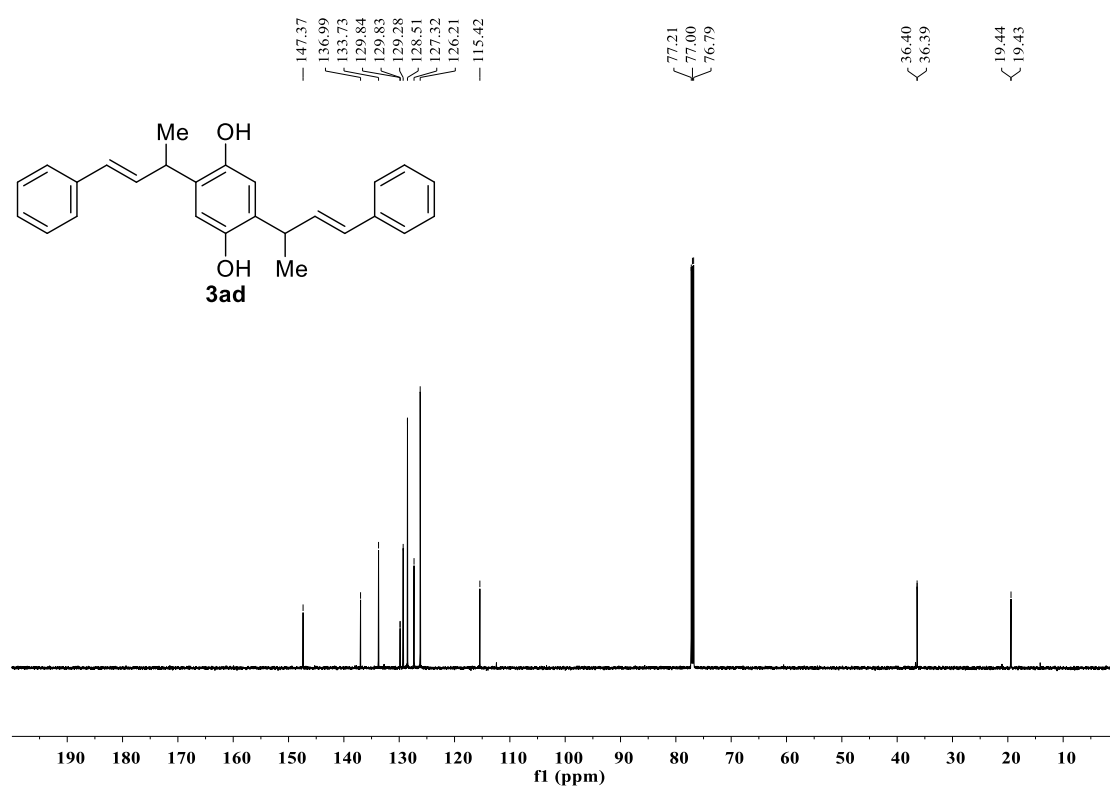

Figure S36. <sup>13</sup>C NMR spectra of **3ad**.

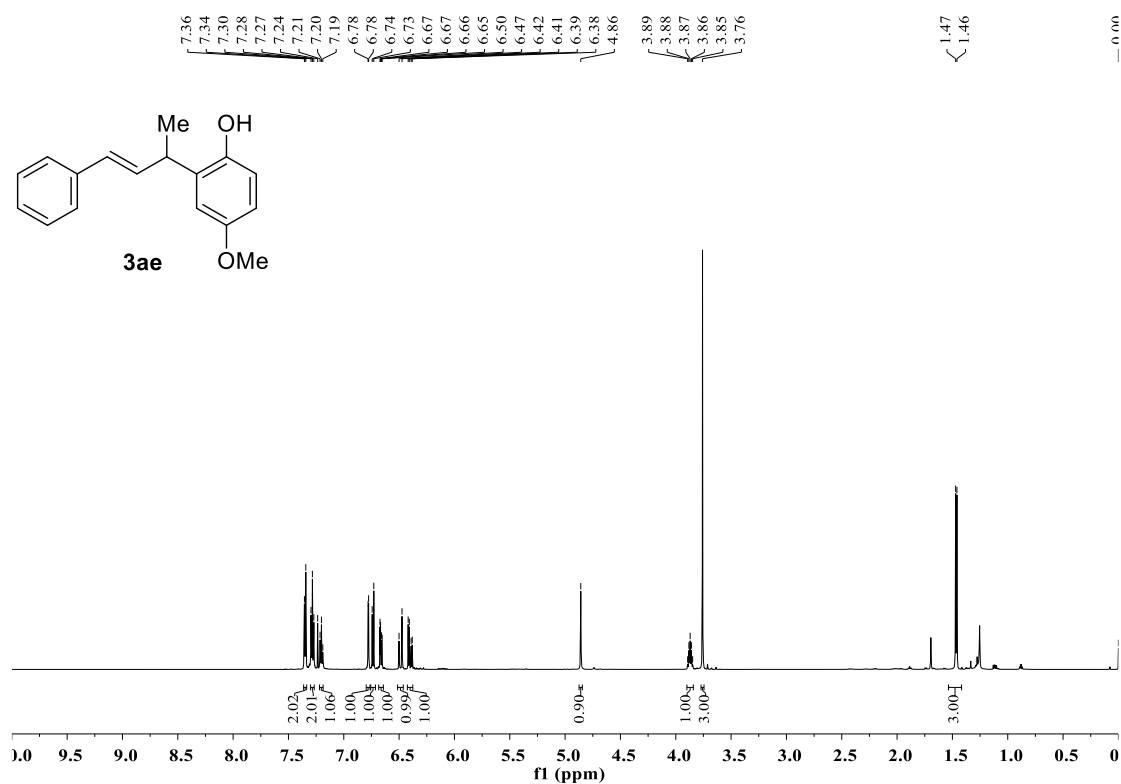

Figure S37. <sup>1</sup>H NMR spectra of **3ae**.

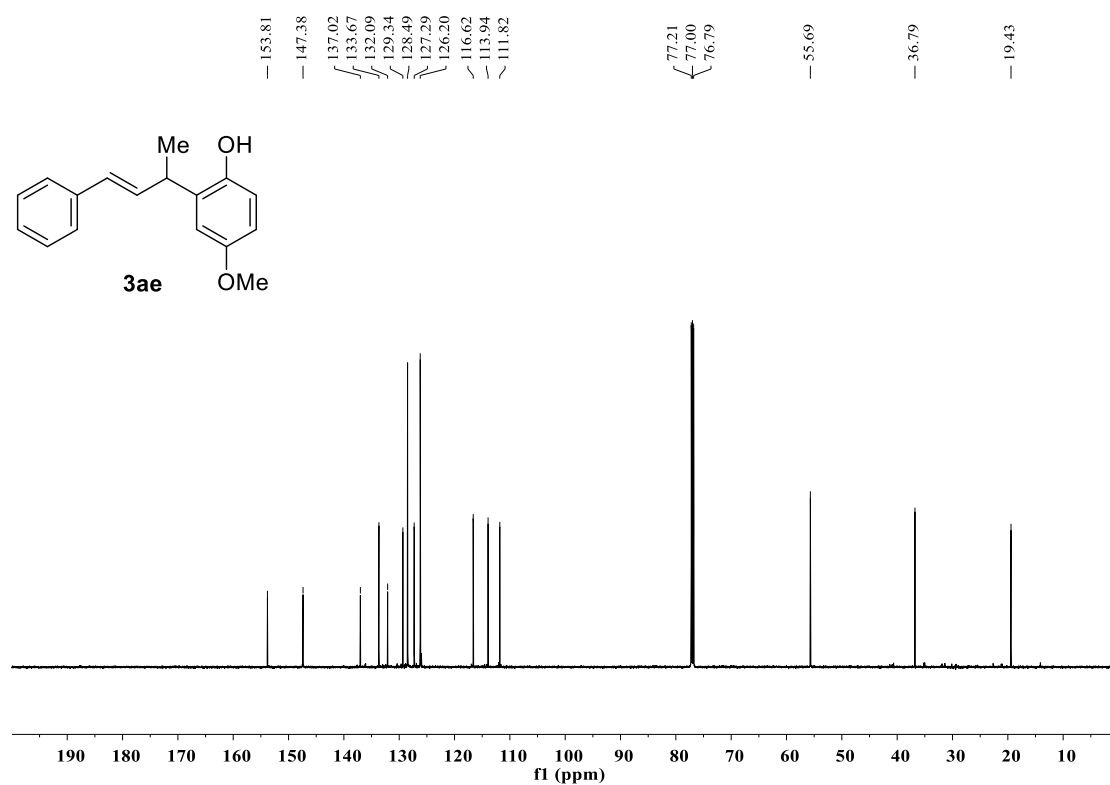

Figure S38. <sup>13</sup>C NMR spectra of **3ae**.

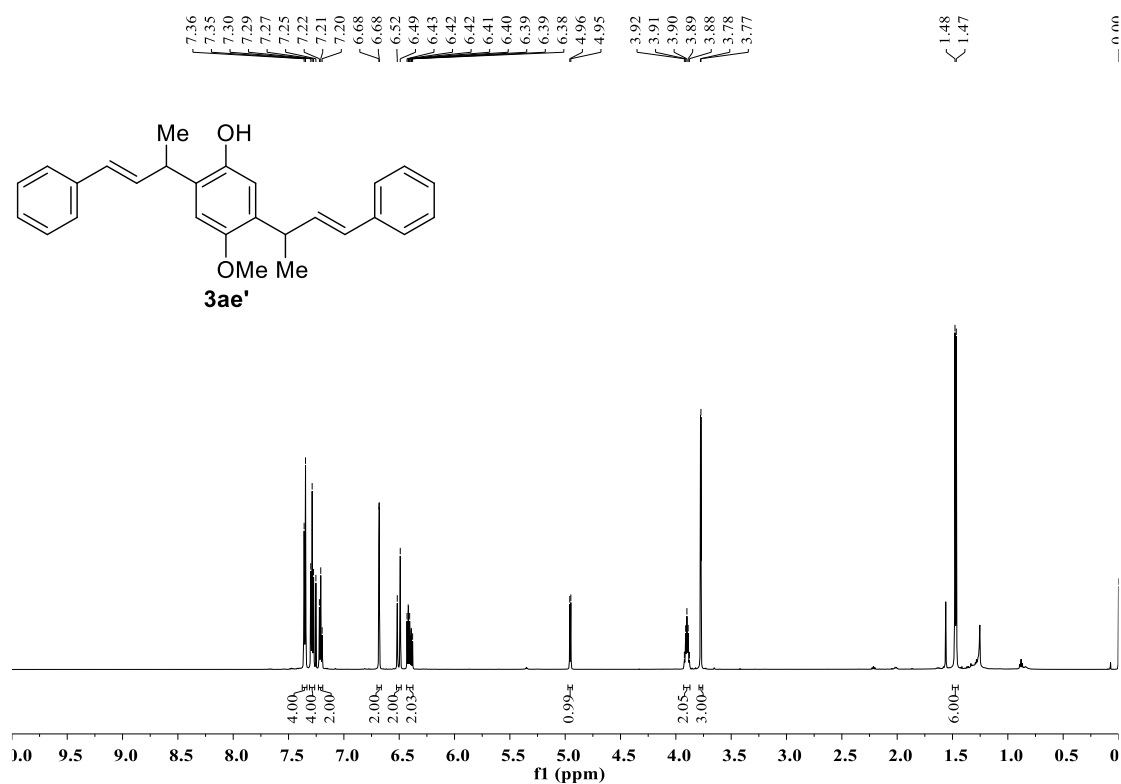

Figure S39.  $^1\text{H}$  NMR spectra of **3ae'**.

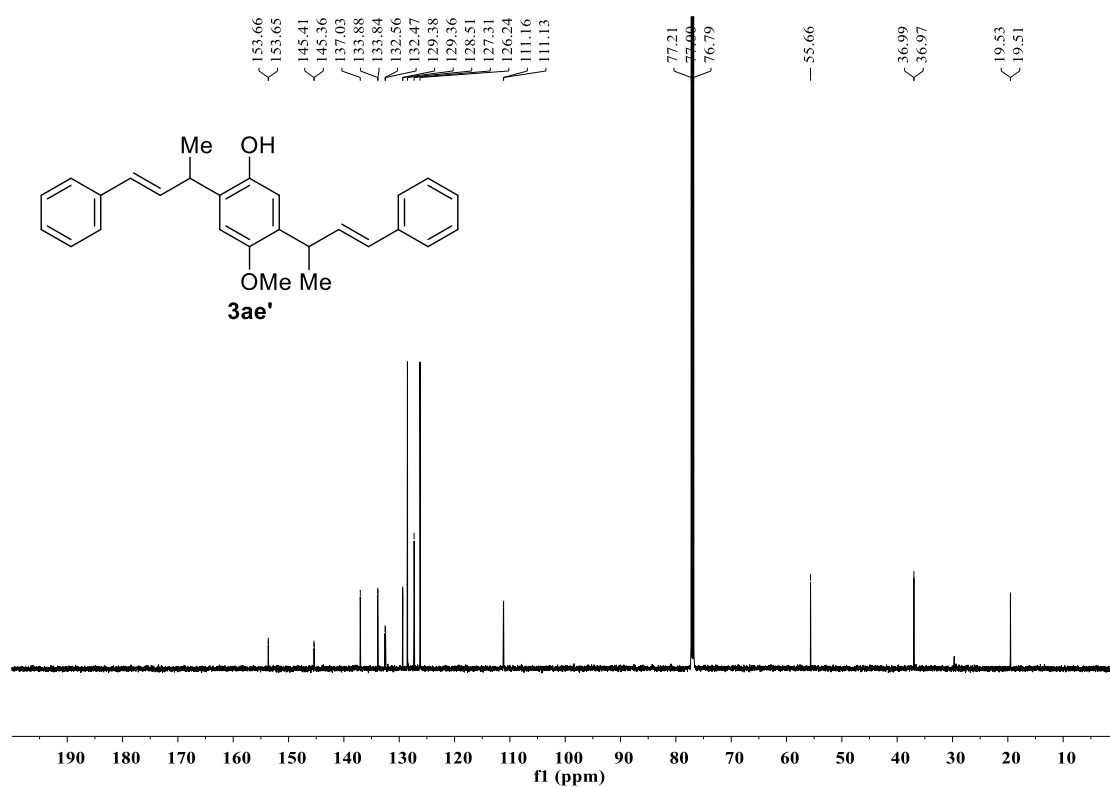

Figure S40.  $^{13}\text{C}$  NMR spectra of **3ae'**.

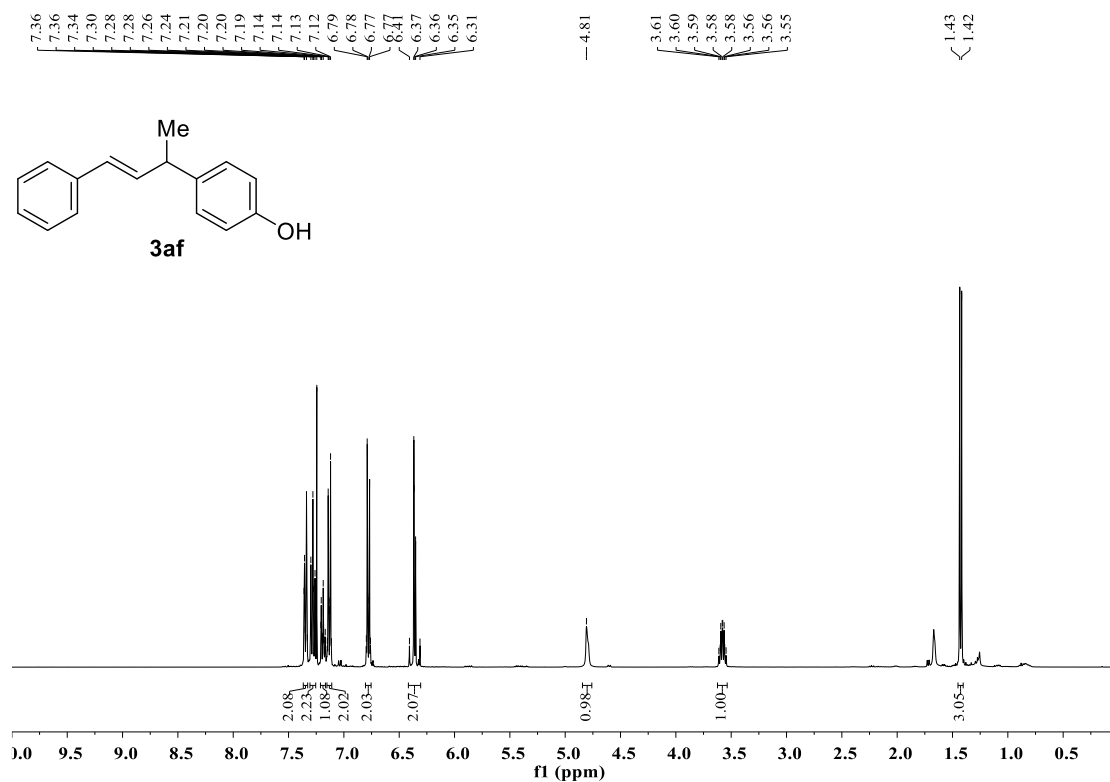

Figure S41.  $^1\text{H}$  NMR spectra of **3af**.

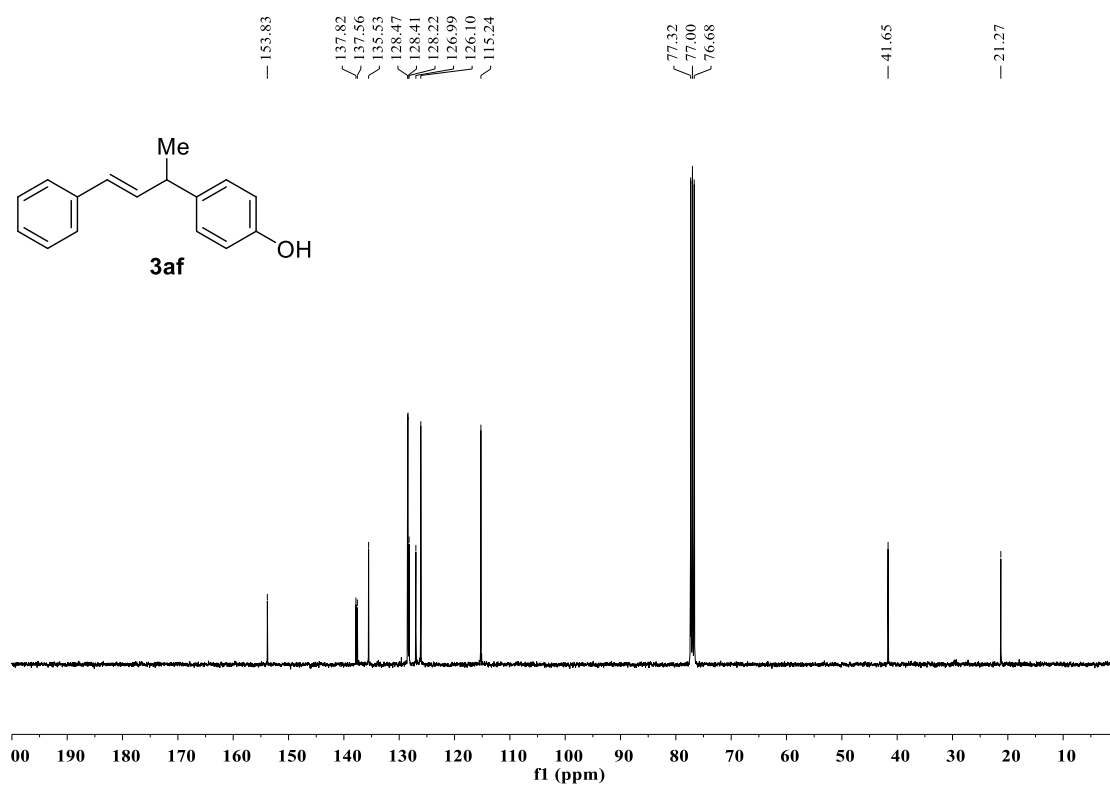

Figure S42.  $^{13}\text{C}$  NMR spectra of **3af**.

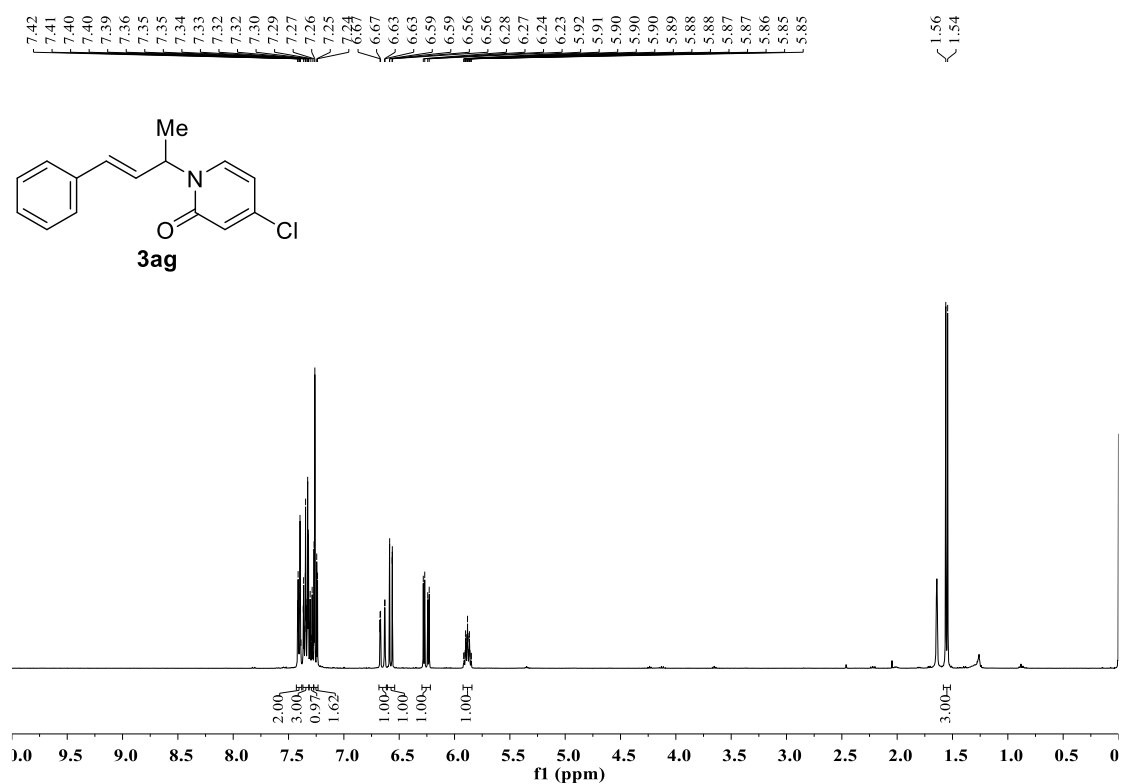

Figure S43. <sup>1</sup>H NMR spectra of **3ag**.

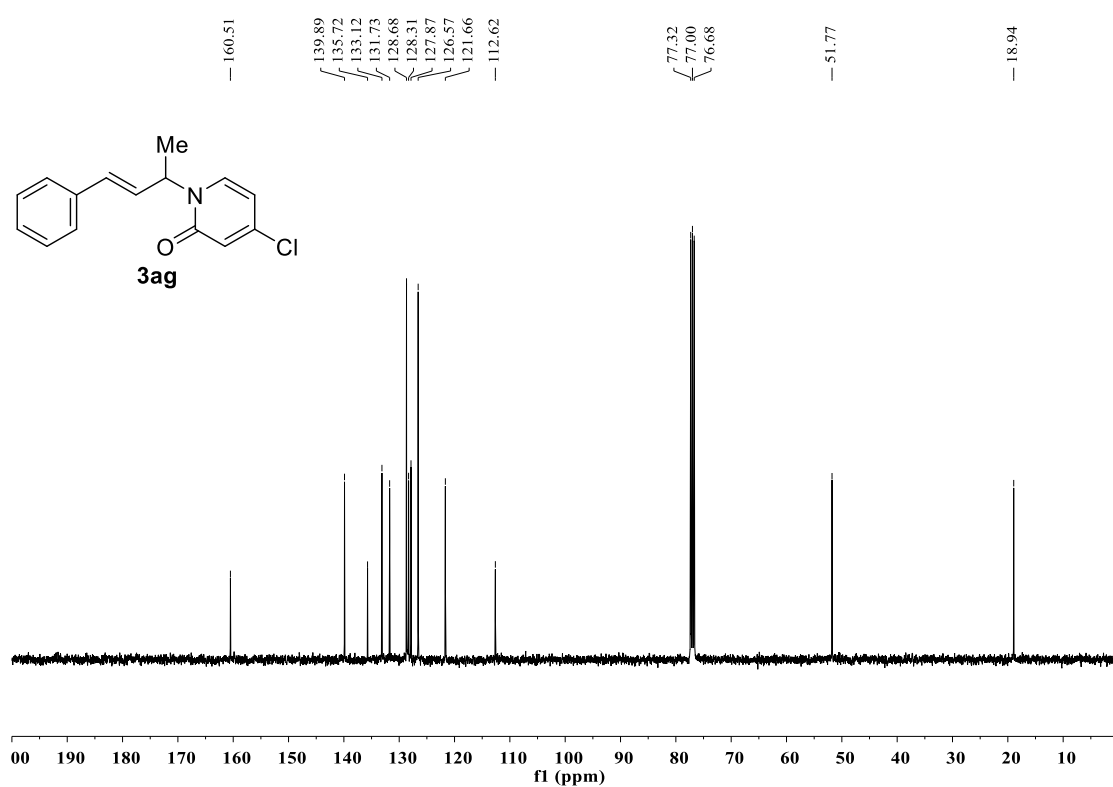

Figure S44. <sup>13</sup>C NMR spectra of **3ag**.



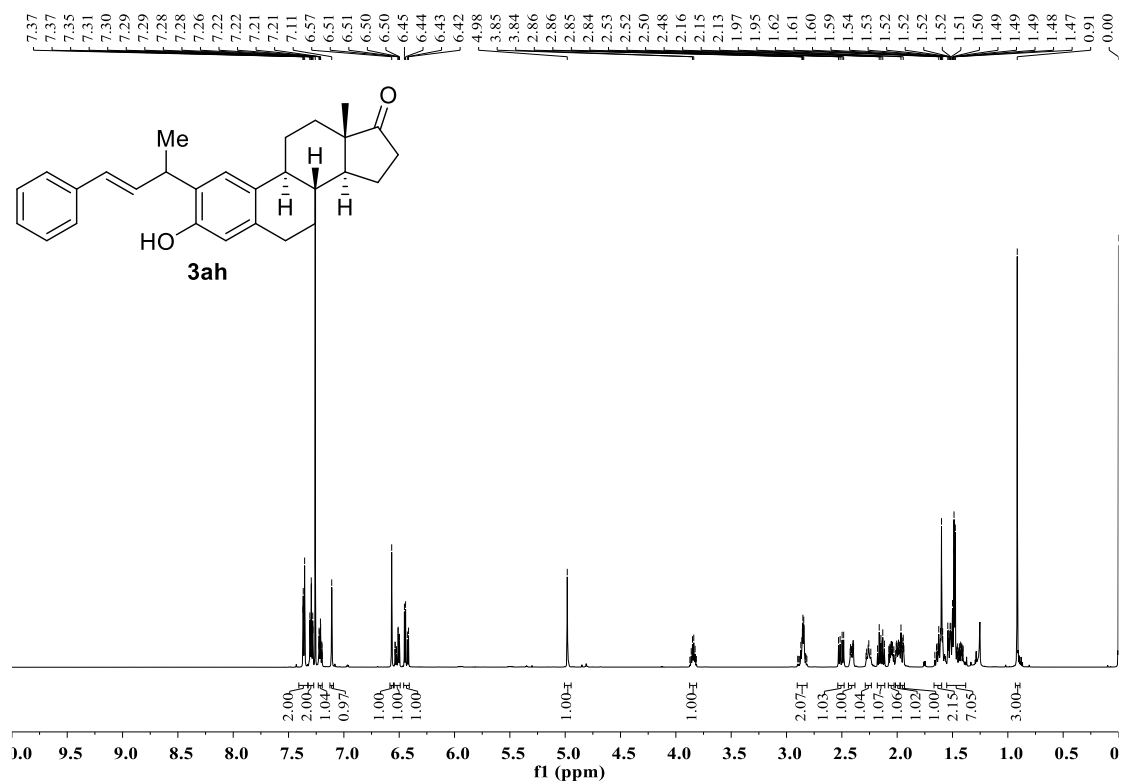

Figure S45. <sup>1</sup>H NMR spectra of 3ah.

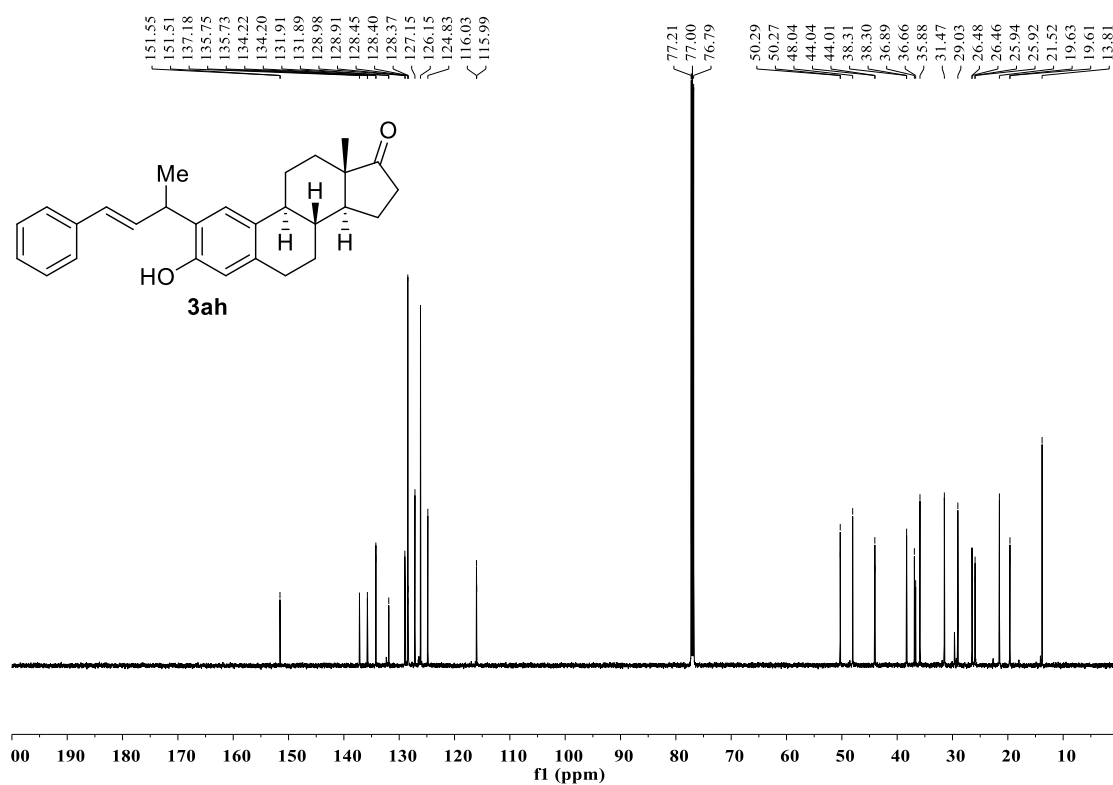

Figure S46. <sup>13</sup>C NMR spectra of 3ah.

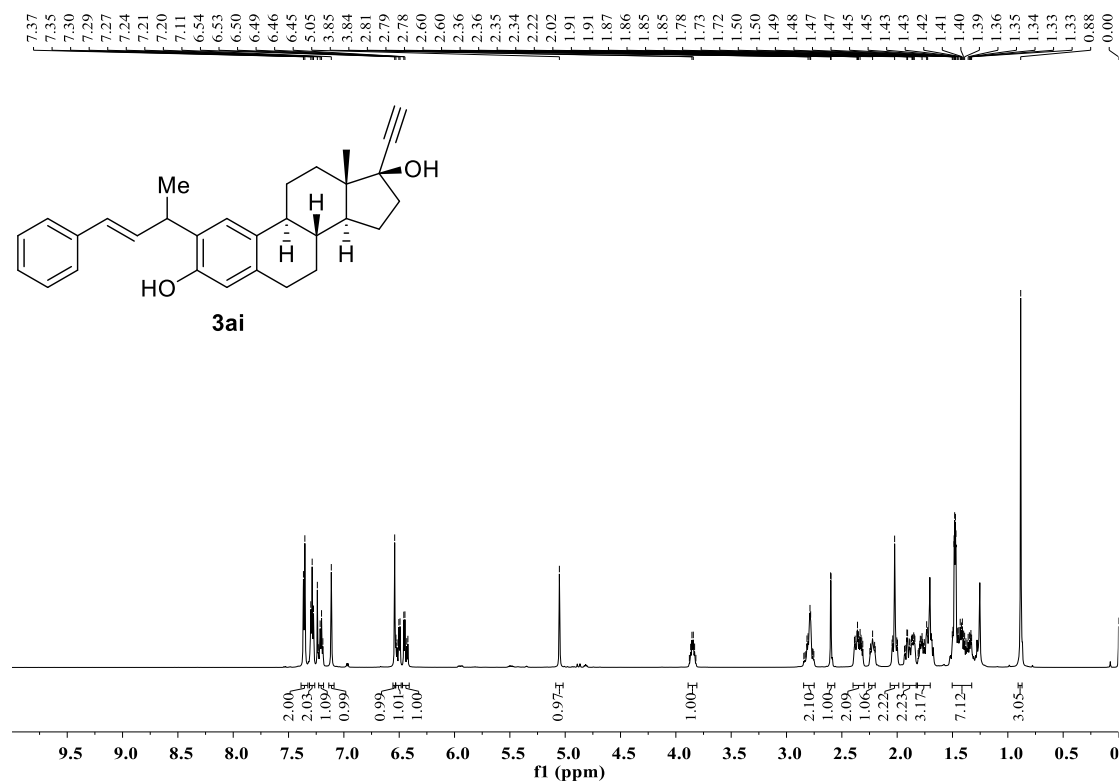

Figure S47.  $^1\text{H}$  NMR spectra of **3ai**.

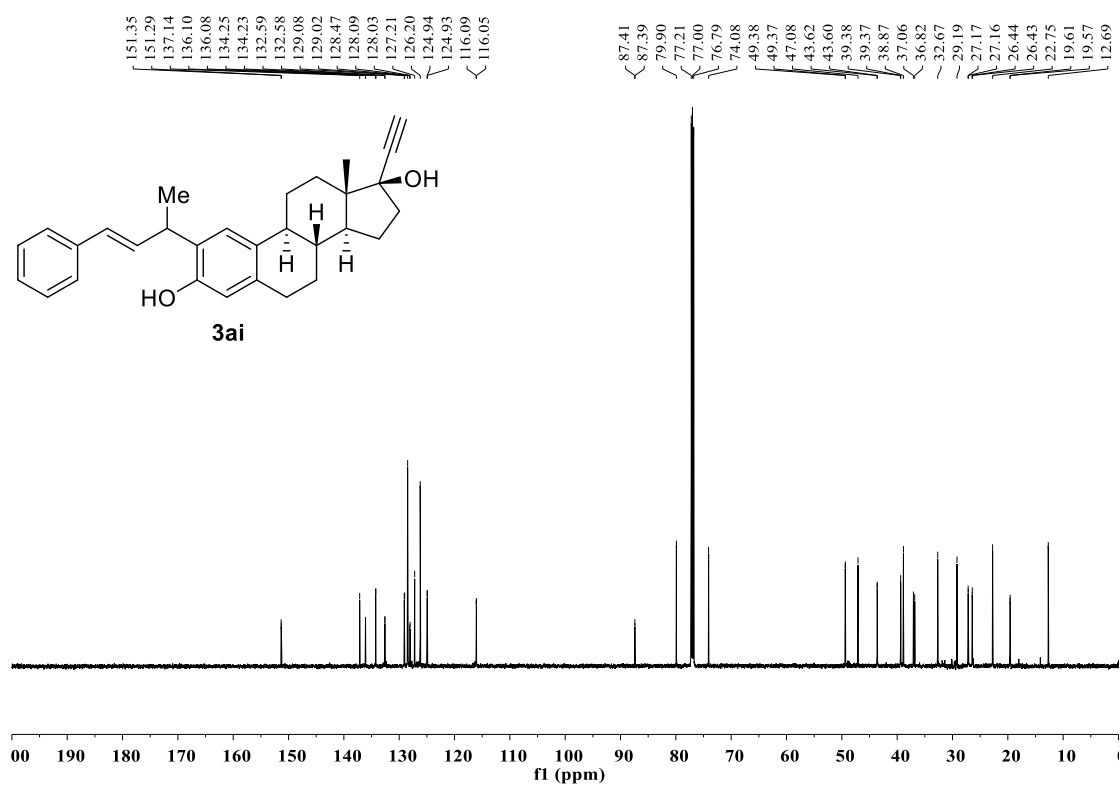

Figure S48.  $^{13}\text{C}$  NMR spectra of **3ai**.

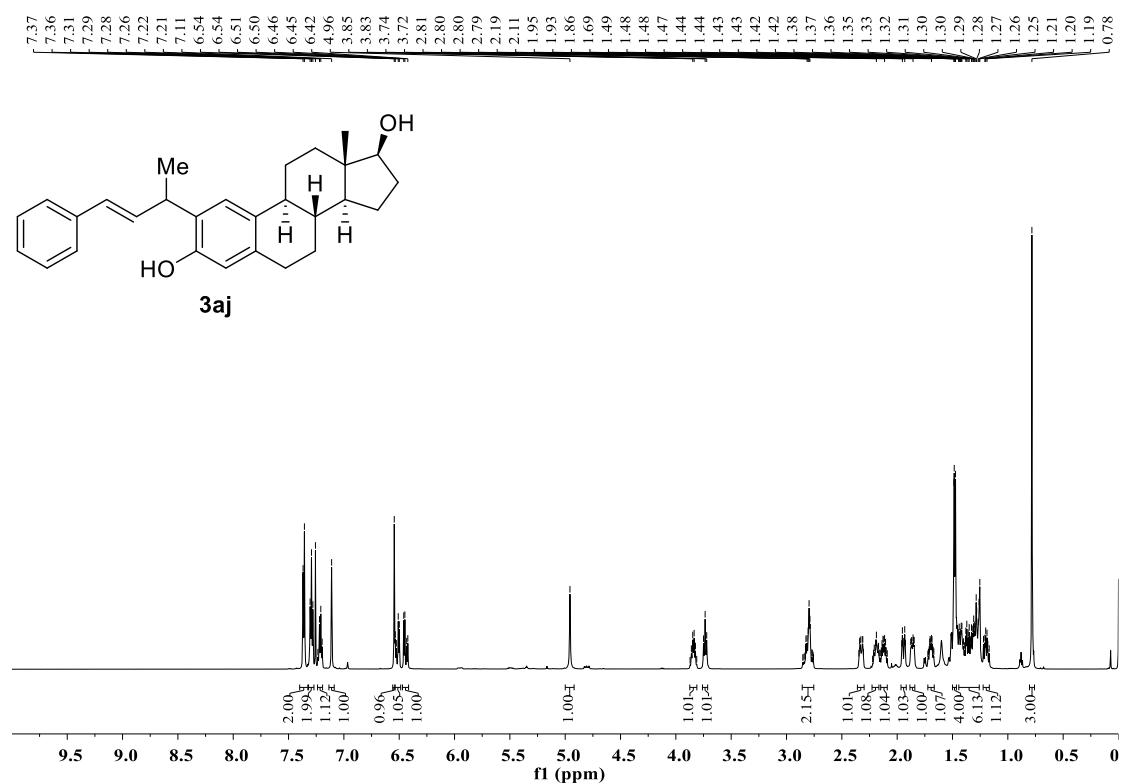

Figure S49.  $^1\text{H}$  NMR spectra of **3aj**.

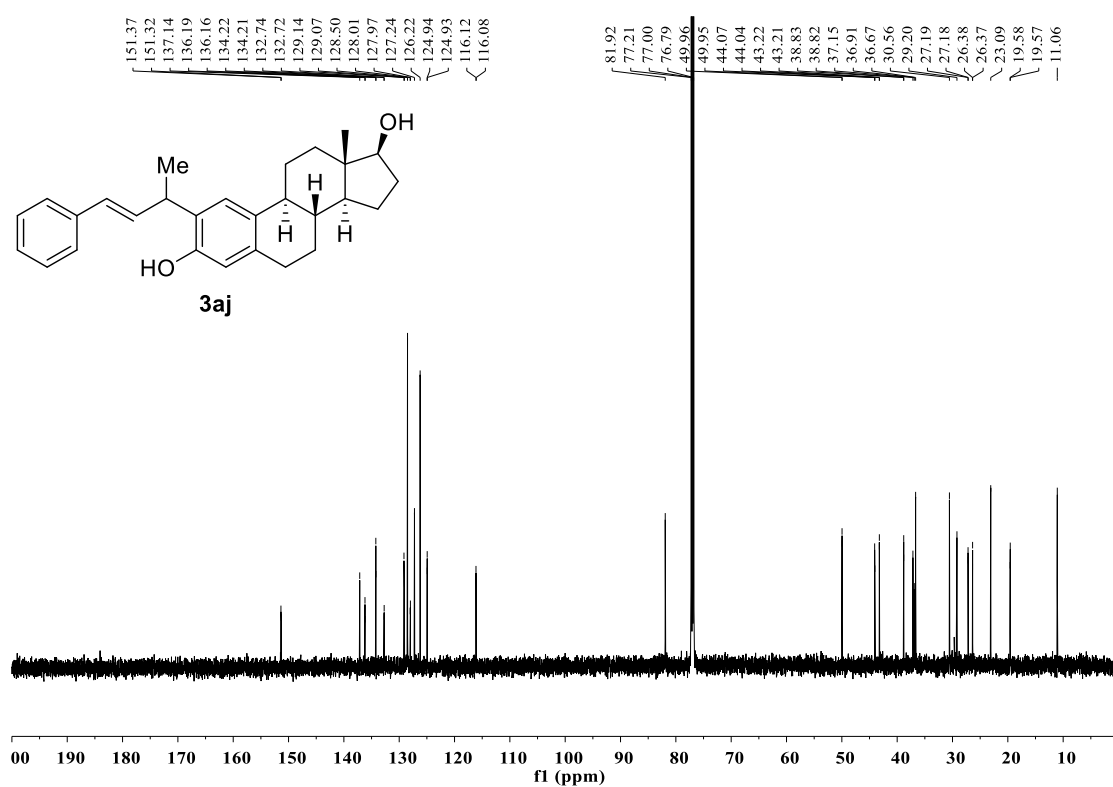

Figure S50.  $^{13}\text{C}$  NMR spectra of **3aj**.
